# 1 **Transcriptomic Response to Nitrogen Availability Highlights Signatures of** 2 **Adaptive Plasticity During Tetraploid Wheat Domestication**

3 Alice Pieri<sup>1</sup>, Romina Beleggia<sup>2\*</sup>, Tania Gioia<sup>3</sup>, Hao Tong<sup>4,5</sup>, Valerio di Vittori<sup>1</sup>, Giulia  
4 Frascarelli<sup>1</sup>, Elena Bitocchi<sup>1</sup>, Laura Nanni<sup>1</sup>, Elisa Bellucci<sup>1</sup>, Fabio Fiorani<sup>6</sup>, Nicola Pecchioni<sup>2</sup>,  
5 Concetta De Quattro<sup>7</sup>, Antonina Rita Limongi<sup>7</sup>, Pasquale De Vita<sup>2</sup>, Marzia Rossato<sup>7</sup>, Ulrich  
6 Schurr<sup>6</sup>, Jacques L. David<sup>8</sup>, Zoran Nikoloski<sup>4,5</sup>, Roberto Papa<sup>1\*</sup>

7

8 <sup>1</sup> Department of Agricultural, Food and Environmental Sciences, Marche Polytechnic  
9 University, via Brece Bianche, 60131, Ancona, Italy

10 <sup>2</sup> Council for Agricultural Research and Economics (CREA), Research Centre for Cereal and  
11 Industrial Crops (CREA-CI), 71122 Foggia, Italy

12 <sup>3</sup> School of Agricultural, Forestry, Food and Environmental Sciences, University of  
13 Basilicata, 85100 Potenza, Italy

14 <sup>4</sup> Bioinformatics Department, Institute of Biochemistry and Biology, University of Potsdam,  
15 14476 Potsdam, Germany

16 <sup>5</sup> Systems Biology and Mathematical Modeling Group, Max Planck Institute of Molecular Plant  
17 Physiology, 14476 Potsdam, Germany

18 <sup>6</sup> Institute of Biosciences and Geosciences (IBG-2): Plant Sciences, Forschungszentrum Jülich  
19 GmbH, 52428 Jülich, Germany

20 <sup>7</sup> Department of Biotechnology, University of Verona, Strada Le Grazie 15, 37134 Verona,  
21 Italy

22 <sup>8</sup> Montpellier SupAgro, UMR Amélioration Génétique et Adaptation des Plantes, 34060  
23 Montpellier, France

24

25 \* **Corresponding authors contact: Roberto Papa: [r.papa@univpm.it](mailto:r.papa@univpm.it); Romina Beleggia:**  
26 [romina.beleggia@crea.gov.it](mailto:romina.beleggia@crea.gov.it)

27

## 28 **Abstract**

29 The domestication of crops, with the development of the agroecosystems, is associated with  
30 major environmental changes and represent a model to test the role of phenotypic plasticity.  
31 Here we investigated 32 genotypes representing key stages of tetraploid wheat domestication.  
32 We developed a dedicated pipeline combining RNA-Seq data, estimates of evolvability and  
33  $Q_{ST}$  to characterize the plasticity of gene expression and identify signatures of selection under  
34 different nitrogen conditions. The analysis of gene expression diversity showed contrasting  
35 results between primary and secondary domestication in relation to nitrogen availability.  
36 Indeed, nitrogen triggered the expression of twice the number of genes in durum wheat  
37 compared to emmer and wild emmer.  $Q_{ST}$  distributions and  $Q_{ST}-F_{ST}$  comparisons revealed  
38 distinct selection signatures at each domestication stage. While primary domestication affected  
39 the expression of genes involved in biotic interactions, secondary domestication was associated  
40 with changes in expression of genes involved in metabolism of amino acids, particularly lysine.  
41 Selection signatures were found also in differentially expressed genes, specifically involved in  
42 nitrogen metabolism, such as *glutamate dehydrogenase*. Overall, our findings show that  
43 nitrogen availability had a pivotal role during the domestication and adaptive responses of a  
44 major food crop, with varying effects across different traits and growth conditions.

45

## 46 **Introduction**

47 Domestication influences the genetic diversity of animals and plants as they adapt to  
48 agroecosystems, and undergo selection to meet human preferences and needs. This process is  
49 typically associated with the genome-wide loss of nucleotide diversity due to the combined  
50 consequences of selection and genetic drift, which is known as the domestication bottleneck.  
51 The loss of genetic diversity has been documented in many domesticated species by comparing  
52 them with wild relatives (Bitocchi et al., 2017). A parallel effect is the reprogramming of gene  
53 expression and the loss of expression diversity, which was first reported in the common bean  
54 (*Phaseolus vulgaris*) (Bellucci et al., 2014) and subsequently in other domesticated plants and  
55 animals (Sauvage et al., 2017; Liu et al., 2019; Burgarella et al., 2021). Similar observations  
56 have been reported at the level of metabolic diversity (Beleggia et al., 2016; Alseekh et al.,  
57 2021).

58 Changes in nucleotide and gene expression diversity during the domestication of tetraploid  
59 wheat (*Triticum turgidum* L.,  $2n = 4x = 28$ ; AABB genome) are not fully understood. Evidence

60 indicates that domestication occurred in two well-defined phases: Primary domestication from  
61 wild emmer (*Triticum turgidum* ssp. *dicoccoides*) to emmer (*Triticum turgidum* ssp. *dicoccum*)  
62 started ~12,000 years ago in the Fertile Crescent. This was followed by secondary  
63 domestication from emmer to durum wheat (*Triticum turgidum* ssp. *durum*), which started  
64 ~2,000 years ago in the Near East and gave rise to durum wheat, the most important form of  
65 tetraploid wheat and currently the most widespread Mediterranean crop (Gioia et al., 2015;  
66 Taranto et al., 2020).

67 The molecular mechanisms underlying phenotypic plasticity in crops (Laitinen and Nikoloski,  
68 2019) and their wild relatives must be understood to address the challenges faced by modern  
69 agriculture, including the overreliance on nitrogen (N) fertilizers to meet Sustainable  
70 Development Goals (SDGs). N is an essential macronutrient whose availability is directly  
71 linked to crop yield and grain quality (protein content) (Barneix, 2007; Howarth et al., 2008;  
72 Laidò et al., 2013), but it is also harmful to people and nature. Indeed, excess of N from  
73 agricultural sources is one of the major pollutant in fresh water (Bijay-Singh and Craswell,  
74 2021). Understanding genetic variations in N acquisition, assimilation and metabolism can  
75 therefore provide novel sustainable strategies for crop improvement (Plett et al., 2018;  
76 Hawkesford and Griffiths, 2019). In tetraploid wheat, phenotypic differences related to N  
77 availability primarily arose during secondary domestication rather than primary domestication  
78 (Gioia et al., 2015), but the relationship between N metabolism and changes in gene expression  
79 plasticity during domestication is unclear.

80 Here we analysed 32 wild emmer, emmer and durum wheat genotypes by RNA-Seq to  
81 determine how contrasting differences in N availability shaped the nucleotide and gene  
82 expression diversity of tetraploid wheat during primary and secondary domestication. Our  
83 results provide insight into the pivotal role of N during the domestication and adaptive  
84 plasticity of one of our major food crops.

85

## 86 **Results and discussion**

### 87 **A greater loss of nucleotide diversity occurred during the secondary domestication of** 88 **tetraploid wheat**

89 We prepared 128 RNA-Seq libraries from 4-week-old leaves of 32 tetraploid wheat genotypes  
90 representing *T. turgidum* ssp. *dicoccoides*, ssp. *dicoccum* and ssp. *durum* (Supplementary Table  
91 S1). On average, 6.8 million of reads per genotype (Supplementary Table S1) were mapped to

92 the A and B reference subgenomes of bread wheat (Alaux et al., 2018). The mapping frequency  
93 exceeded 85% for all the three subspecies and the fraction of reads mapping to gene regions  
94 exceeded 72% (Supplementary Table S1).

95 Variant calling produced 800,996 high-quality single-nucleotide polymorphisms (SNPs). The  
96 number of polymorphic sites was similar in wild emmer (617,128) and emmer (613,509), but  
97 was much lower in durum wheat (425,513), confirming the higher genetic diversity of the wild  
98 population. We identified 190,377 common SNPs shared by all three taxa. As expected, wild  
99 emmer and emmer shared the highest percentage of SNPs (33%, 206,578). In contrast, durum  
100 wheat shared only 11% (46,352) of its SNPs with wild emmer and 17% (71,147) with emmer.

101 SNPs principal component analysis (PCA) revealed the broad genetic structure of the three  
102 wheat taxa (Figure 1) and confirmed that secondary domestication had a greater impact than  
103 primary domestication in differentiating the durum wheat subspecies. The analysed 12 durum  
104 wheat genotypes are genetically very similar, forming a dense cluster that is clearly  
105 distinguishable from the wild emmer and emmer genotypes. In contrast, the wild emmer and  
106 emmer genotypes were loosely clustered, indicating a greater genetic admixture. These results  
107 are consistent with previous genetic studies on the origins of domesticated wheat and reflect  
108 the multiple stages of domestication (Luo et al., 2007; Cíván et al., 2013; Oliveira et al., 2020),  
109 and indicate that the used genotypes are representative.

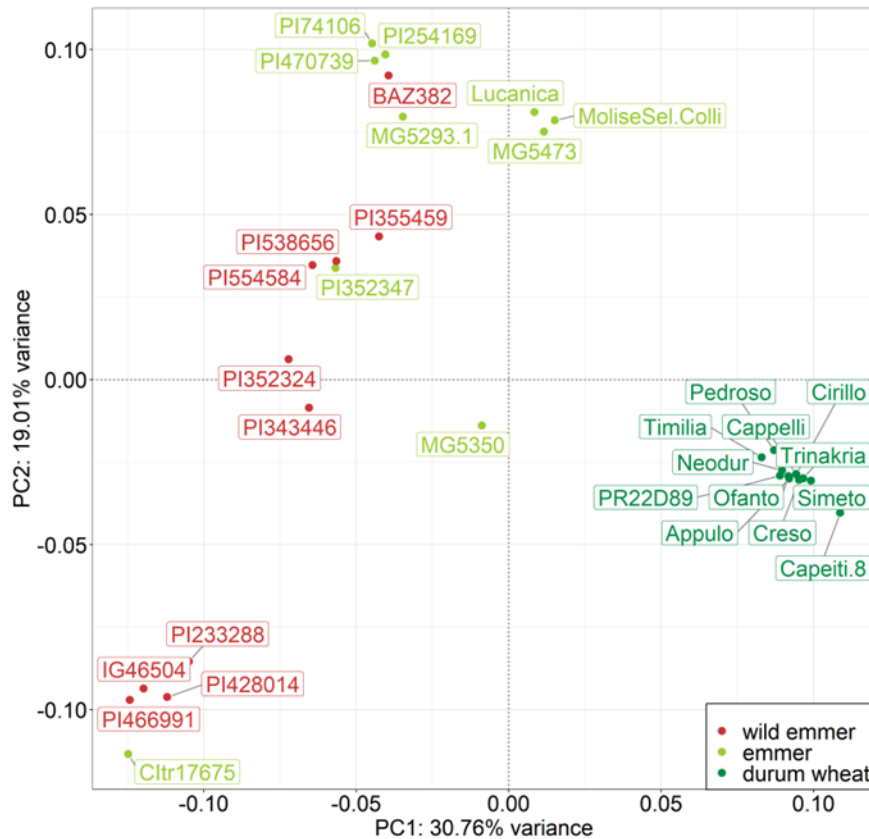

**Figure 1: Principal component analysis of 32 wheat genotypes based on single-nucleotide polymorphisms (SNPs).** The first two principal components (PC1 and PC2) are shown. The three colors represent different taxa. Labels show the accession name of each genotype.

Nucleotide diversity estimates (Table 1) show the expected substantial loss of nucleotide diversity during domestication. The average nucleotide diversity of durum wheat was ~35% lower than domesticated emmer, which was in turn ~11% lower than wild emmer, highlighting the greater impact of secondary domestication. When the cumulative effect of primary and secondary domestication is taken into account, we observed a ~42% reduction in the nucleotide diversity of durum wheat compared to its wild ancestor (Table 1).

|          |            |        |             | Loss of nucleotide diversity (%) |      |      |
|----------|------------|--------|-------------|----------------------------------|------|------|
|          | wild emmer | emmer  | durum wheat | Lpd                              | Lsd  | both |
| $\pi$    | 0.0050     | 0.0045 | 0.0029      | 11.4                             | 34.6 | 42.1 |
| $\theta$ | 0.0047     | 0.0040 | 0.0029      | 15.3                             | 27.2 | 38.3 |

125 **Table 1: Nucleotide diversity estimates and diversity loss for the three wheat taxa.**

126 Diversity loss is shown during primary domestication (wild emmer to emmer, Lpd), secondary  
127 domestication (emmer to durum wheat, Lsd) and both processes (wild emmer to durum wheat),  
128 based on average  $\pi$  and  $\theta$  values. The  $\pi$  and  $\theta$  symbols represent averaged estimates of  
129 nucleotide diversity.

130

131 **The variability of gene expression during domestication was influenced by N availability**

132 To quantify the diversity of gene expression in each subspecies, we calculated evolvability  
133 scores under high and low N availability conditions. Evolvability was estimated using the  
134 additive coefficient of variation ( $CV_A$ ) in read counts (Supplementary Table S2). In contrast to  
135 heritability,  $CV_A$  is a standardized measure of additive genetic variation that is not influenced  
136 by other sources of variance (Houle, 1992; Hansen et al., 2011), and is therefore well suited for  
137 comparative analysis (Garcia-Gonzalez et al., 2012). As for nucleotide diversity, we found that  
138 the  $CV_A$  decreased during domestication under both N conditions; however, the mean  $CV_A$  of  
139 all three subspecies was higher under low N conditions (Figure 2a,b; Table 2). High N  
140 availability therefore appears to promote a more uniform gene expression pattern, whereas  
141 higher variability is observed during N starvation. The association between domestication and  
142 declining diversity in gene expression has also been reported in crops, such as: common bean  
143 (Bellucci et al., 2014), tomato (Sauvage et al., 2017) and sorghum (Burgarella et al., 2021) as  
144 well as domesticated animal species (Liu et al., 2019).

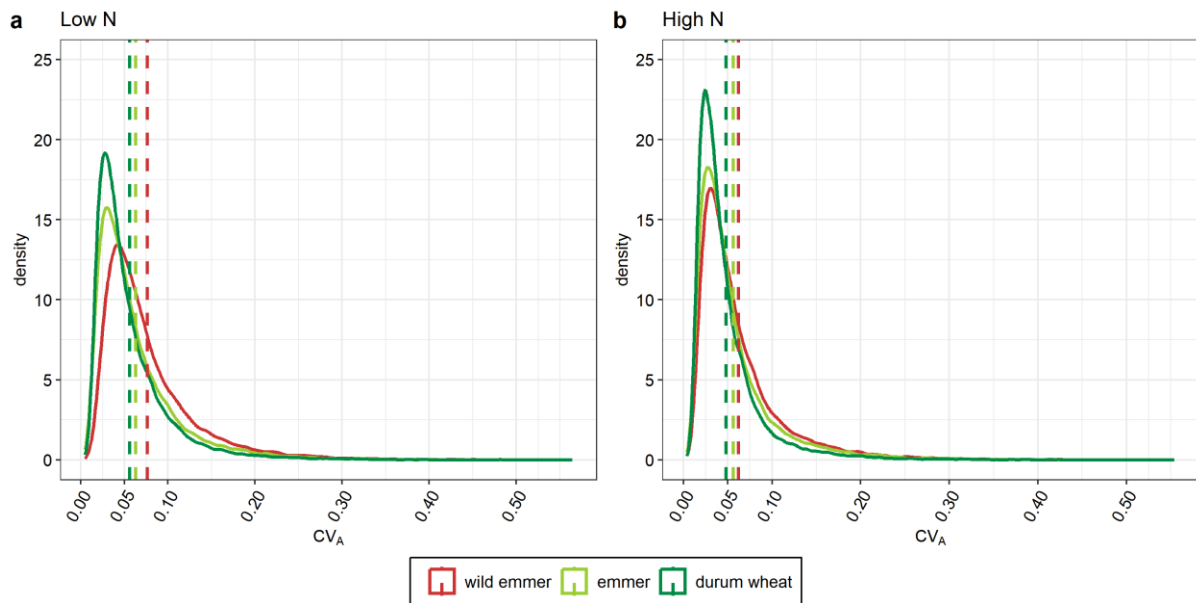

145

146 **Figure 2: Density plots of the additive coefficient of variation ( $CV_A$ ) in the three wheat**  
147 **taxa.** Comparison of the estimated density functions of the  $CV_A$  in gene expression, calculated  
148 using all 32,358 genes. **a** High nitrogen conditions. **b** Low nitrogen conditions. Dashed lines  
149 represent the averaged  $CV_A$  value, colored according to the different taxa.

150

151 We used the contrasting N conditions of our samples to examine whether the loss of expression  
152 diversity is associated with the specific aspects of the cultivation environment, causing primary  
153 and secondary domestication to have a significantly different impact. Under high N conditions,  
154 we observed a ~9% loss in expression diversity in emmer compared to wild emmer (effect of  
155 primary domestication) and a ~15% loss in durum wheat compared to emmer (effect of  
156 secondary domestication). In contrast, these losses were ~18% and 11% under N starvation  
157 conditions, revealing twice the loss of expression diversity during primary domestication, but  
158 a lower value during secondary domestication (Table 2). All four values differed significantly  
159 from each other (Mann–Whitney test,  $p < 0.001$ ). The opposing expression diversity profiles  
160 during domestication under high and low N conditions were observed not only for overall gene  
161 expression, but also for the subgroup comprising all differentially expressed genes (DEGs) and  
162 the subgroup comprising all unmodulated genes (Supplementary Table S3). The loss of  
163 expression diversity among the DEGs due to primary domestication was ~9% and ~15% under  
164 high and low N conditions, respectively, whereas the loss due to secondary domestication was  
165 ~18% and ~14% under high and low N conditions, respectively (Supplementary Table S3).

166 The loss of expression diversity among the unmodulated genes was similar to the values for  
167 overall gene expression (Supplementary Table S3).

|                        | wild<br>emmer | emmer | durum<br>wheat | Loss of expression diversity (%) |      |      |
|------------------------|---------------|-------|----------------|----------------------------------|------|------|
|                        |               |       |                | Lpd                              | Lsd  | both |
| CV <sub>A</sub> high N | 0.062         | 0.056 | 0.048          | 9.1                              | 14.5 | 22.3 |
| CV <sub>A</sub> low N  | 0.076         | 0.063 | 0.056          | 17.6                             | 11.1 | 26.7 |

168 **Table 2: Mean additive coefficient of variation (CV<sub>A</sub>) in gene expression and loss of**  
169 **expression diversity for the three wheat taxa.** Diversity loss is shown during primary  
170 domestication (wild emmer to emmer, Lpd), secondary domestication (emmer to durum wheat,  
171 Lsd) and both processes (wild emmer to durum wheat), based on averaged CV<sub>A</sub> values  
172 calculated for all 32,358 genes.

173

174 A phenotypic study of the same accessions used in the present work has already shown that  
175 secondary domestication reduced the phenotypic diversity under high N conditions, but the  
176 reduction was smaller and not significant under N starvation conditions (Gioia et al., 2015). In  
177 the case of durum wheat, selection has apparently enhanced the growth response to N  
178 availability, indicating a putative focus on improving N uptake and utilization efficiency. Our  
179 expression diversity results indicate that selection has favored specific traits and thus led to a  
180 more uniform set of cultivars, as also suggested in earlier study using morphological traits  
181 (Gioia et al., 2015).

182

### 183 **Domestication and nitrogen availability shaped the divergence of tetraploid wheats**

184 Genetic differentiation among the three subspecies was estimated by calculating the pairwise  
185 fixation index ( $F_{ST}$ ) for every gene locus in our dataset. As shown in Figure 3a, the lowest  
186 genetic differentiation was observed between wild emmer and emmer (mean  $F_{ST} = 0.09$ ),  
187 whereas much higher genetic differentiation was found between emmer and durum wheat  
188 (mean  $F_{ST} = 0.27$ ) and, similarly, between wild emmer and durum wheat (mean  $F_{ST} = 0.28$ ).  
189 These values align with earlier findings that examined broad collections of tetraploid wheat  
190 accessions (Luo et al., 2007; Mazzucotelli et al., 2020), and provide additional evidence for the  
191 representativeness of the genotypes used.



192 Divergence at the transcriptomic level was estimated by calculating  $Q_{ST}$ , the quantitative analog  
193 of  $F_{ST}$ , taking N availability into account as an environmental variable. Under both N  
194 conditions, we observed the same trend shown for  $F_{ST}$  (Figure 3b). Specifically, secondary  
195 domestication had a stronger impact on differentiation (emmer vs durum wheat, mean  $Q_{ST LN} =$   
196 0.23, mean  $Q_{ST HN} = 0.33$ ) than primary domestication (wild emmer vs emmer, mean  $Q_{ST LN} =$   
197 0.16, mean  $Q_{ST HN} = 0.23$ ). Interestingly, the  $Q_{ST}$  distributions of every pairwise comparison  
198 showed higher values under high N conditions compared to N starvation (Figure 3b),  
199 suggesting that N availability during domestication significantly contributed to the  
200 differentiation of gene expression in tetraploid wheats.

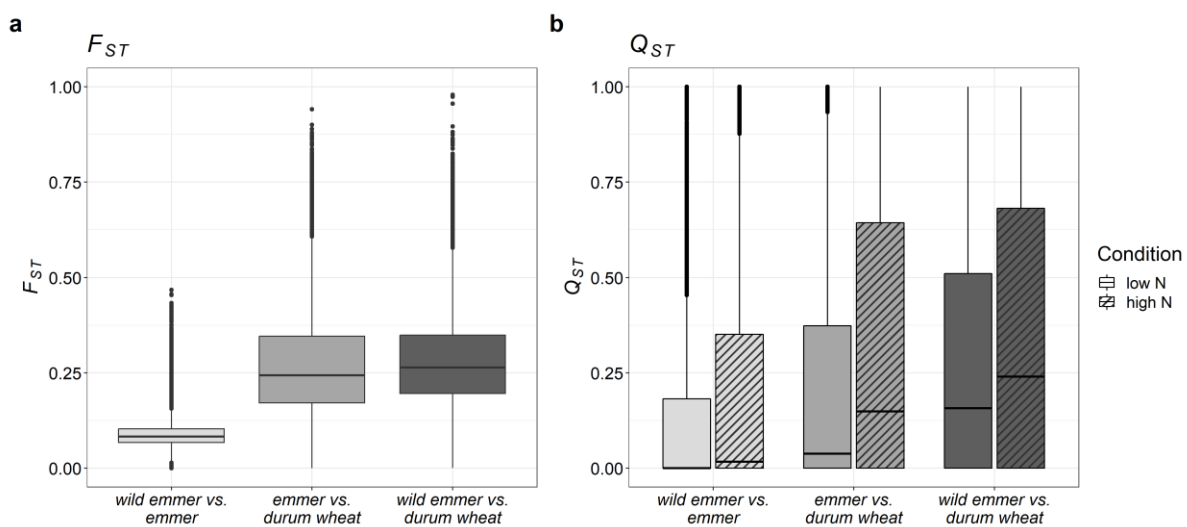

201

202 **Figure 3:  $F_{ST}$  and  $Q_{ST}$  distributions.** **a** Boxplots showing the gene locus  $F_{ST}$  distribution for  
203 every subspecies pairwise comparison. **b** Boxplots showing the transcript  $Q_{ST}$  distribution for  
204 every subspecies pairwise comparison under low nitrogen and high nitrogen conditions,  
205 represented by empty and hatched grayscale bars, respectively.

206

207 The  $Q_{ST}$  distributions were used to perform a “selection scan”, seeking genes whose expression  
208 was potentially under selection. Starting from 5,868 genes meeting the heritability criteria  
209 ( $H^2 \geq 0.7$  or  $S \times N \geq 0.2$ , that is the species  $\times$  environment variance component i.e., every species  
210 subgroup  $\times$  N condition; Supplementary Figure S1), we retained 973 genes having  $Q_{ST}$  values  
211 in the 5% right tail of the distributions. The  $Q_{ST}-F_{ST}$  comparison method (Leinonen et al., 2013)  
212 was then used to confirm that the divergent expression (high  $Q_{ST}$  values) of the filtered genes  
213 was caused by directional selection ( $Q_{ST} > F_{ST}$ ) and not by genetic drift ( $Q_{ST} \approx F_{ST}$ ) or stabilizing  
214 selection ( $Q_{ST} < F_{ST}$ ) (Leinonen et al., 2013). After removing  $F_{ST}$  values  $< 0.01$ , we retained

215 967 genes satisfying the criterion  $Q_{ST} > F_{ST}$ , indicating that their expression was likely  
216 subjected to directional selection in at least one of the evolutionary contexts examined herein  
217 (i.e., primary and/or secondary domestication under high and/or low N availability conditions)  
218 (Supplementary Table S4).

219 Gene Ontology (GO) enrichment analysis revealed that selection acted on distinct gene  
220 categories during primary and secondary domestication (Supplementary Figure S2). During  
221 primary domestication, we found categories associated with “defense-related programmed cell  
222 death, modulated by biotic interactions”, indicating an enhanced plant hypersensitive response  
223 to pathogens. This can be interpreted as a consequence of the transition from the natural  
224 growing environment of the wild genotypes to agroecosystems characterized by high-density  
225 domesticated crop monocultures. In this context, crops face higher disease pressure from crop-  
226 specific pathogens (Savary et al., 2019) and therefore induce a hypersensitive response, which  
227 can lead to programmed cell death and necrosis as a defense mechanism. It is important to note  
228 that pathogen defense mechanisms in plants often overlap with the regulation of beneficial  
229 symbiotic interactions, therefore, one expects a trade-off between traits associated with  
230 symbiosis and innate immunity (Porter and Sachs, 2020). Moreover, domesticated crops are  
231 less able to fully benefit from microbial interactions than their wild relatives, as observed in a  
232 comparative study of bread wheat landraces as well as old and modern varieties (Valente et al.,  
233 2023). One contributing factor is the widespread use of high-input agricultural practices,  
234 because the availability of fertilizers reduces the need for plants to invest in symbiotic  
235 relationships (Martín-Robles et al., 2018). Additionally, certain target traits in plant breeding,  
236 such as phytohormones that regulate flowering time and plant height, can have unintended  
237 effects on beneficial symbiosis due to pleiotropy (Sawers et al., 2018).

238 Among the genes found to be under selection during secondary domestication, we observed  
239 the enrichment of categories associated with amino acid metabolism, particularly those related  
240 to the “lysine catabolic process” (Supplementary Figure S2). This included genes encoding the  
241 bifunctional enzyme lysine ketoglutarate reductase/saccharopine dehydrogenase (LKR/SDH).  
242 This enzyme is ubiquitous in plants and animals, and represents the key step in lysine  
243 catabolism via the saccharopine pathway (SACPATH). The structure and transcription of the  
244 *LKR/SDH* gene has been studied in *T. durum* and compared with other plants, showing species-  
245 dependent differences in expression levels including lineage-specific differences between  
246 monocots and dicots (Anderson et al., 2010). Lysine is the first limiting essential amino acid  
247 in cereal grains and its catabolic pathway has been targeted to increase the lysine content of

248 maize and rice seed (Houmard et al., 2007; Frizzi et al., 2008; Long et al., 2013). Generally,  
249 the quantity of lysine-containing proteins in cereal seeds is much lower than that of storage  
250 proteins devoid of lysine, such as prolamins (specifically gliadin in wheat). The SACPATH  
251 seems to channel the lysine skeleton into the production of glutamic acid, which is a precursor  
252 of proline, one of the most abundant amino acids in gluteins (Arruda et al., 2000).

253 General changes in amino acid metabolism during domestication have been observed in other  
254 crops based on nucleotide data, including sunflower (Chapman et al., 2008), maize (Swanson-  
255 Wagner et al., 2012) and common bean (Bellucci et al., 2014). Evolutionary metabolomics has  
256 also revealed signatures of selection affecting amino acid metabolism during secondary  
257 domestication (Beleggia et al., 2016). In durum wheat, domestication was linked to the  
258 selection of a specific protein composition and led to a notable decrease in the diversity of  
259 gliadin and glutenin subunits, strongly correlating with grain yield and the technological  
260 properties of gluten (Laidò et al., 2013). The analysis of spring wheat genotypes has shown  
261 that the SACPATH is upregulated in response to drought stress, and is significantly more active  
262 in drought-tolerant compared to drought-susceptible genotypes (Michaletti et al., 2018). This  
263 may reflect the role of proline, which can be produced from this pathway, as a major constituent  
264 of storage proteins and one of the main osmoprotectants produced as a response to stress (Kavi  
265 Kishor et al., 2022). These findings suggest that selection for stress-tolerant genotypes as well  
266 as seed protein composition during wheat domestication influenced the expression of  
267 SACPATH genes.

268

269 **Changes in nitrogen availability trigger gene expression, resulting in a twofold increase**  
270 **in the number of differentially expressed genes in durum wheat compared to emmer and**  
271 **wild emmer wheat.**

272 We identified DEGs in each subspecies that discriminated between high N conditions and N  
273 starvation using a stringent pipeline and strict thresholds ( $p\text{-adjust} < 0.001$ ) to reduce the  
274 number of false positives. We found 3,326 DEGs in wild emmer, 3,305 in emmer and 5,901 in  
275 durum wheat, with more upregulated than downregulated genes in all three subspecies. Durum  
276 wheat had the highest percentage of private DEGs (~42%, 2,479), whereas similar numbers  
277 were found in wild emmer (~14%, 458) and emmer (~15%, 486). Wild emmer and emmer  
278 shared ~23% (749) and ~21% (700), respectively, of their DEGs with durum wheat. The  
279 percentage of DEGs shared only between wild emmer and emmer was 4% (146), but almost

280 60% of wild emmer and emmer DEGs and ~33% of durum wheat DEGs were shared by all  
281 three taxa (Figure 4a). The proportions of private and shared DEGs were preserved when we  
282 separated them into upregulated and downregulated subsets (Figure 4b,c). In all three taxa,  
283 most DEGs were located on chromosomes 2A, 2B, 3A, 3B, 5A and 5B, each carrying > 7.5%  
284 of the DEGs; in contrast, chromosomes 6A and 6B each contained only ~5% of the DEGs  
285 Supplementary Figure S3.

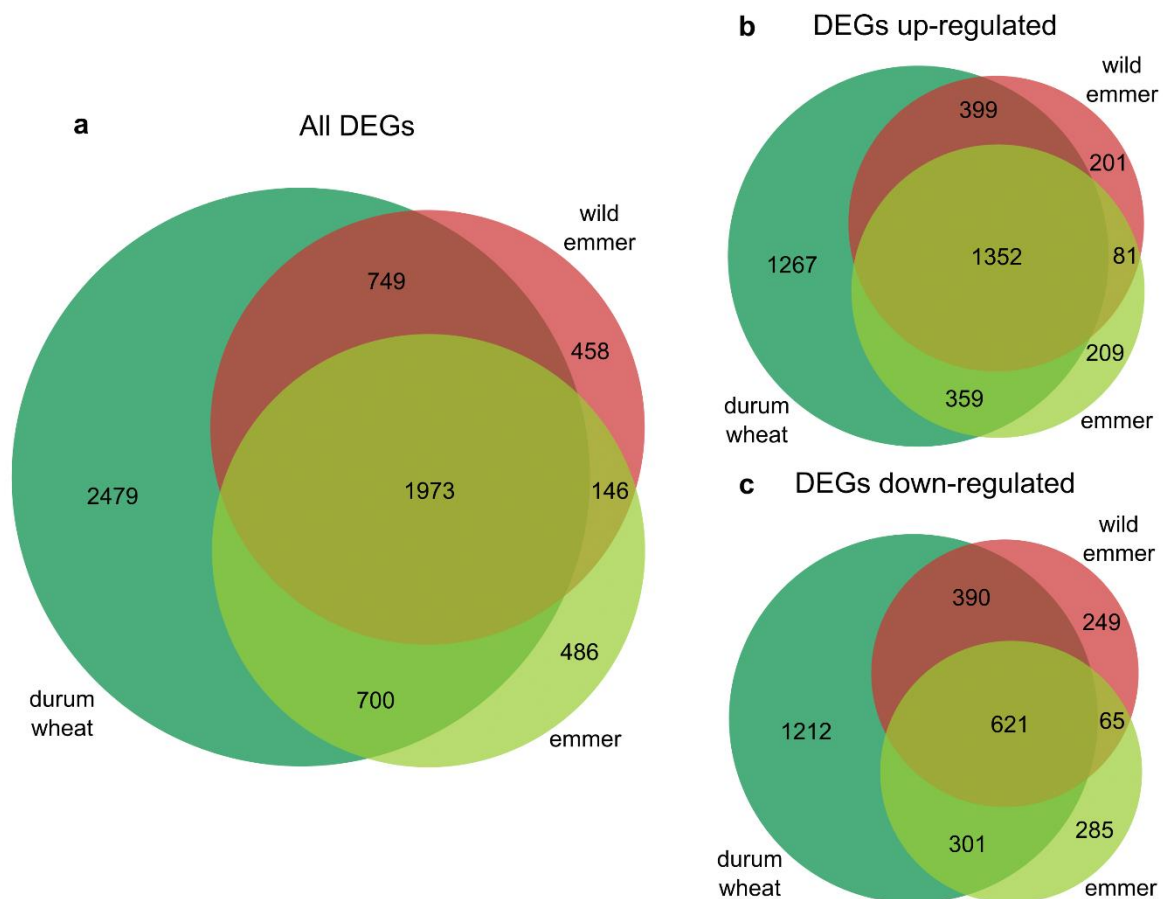

286

287 **Figure 4: Differentially expressed genes (DEGs) when comparing high and low nitrogen**  
288 **conditions within each subspecies.** Venn diagrams showing **a** Total set of DEGs; **b**  
289 upregulated DEGs only; and **c** downregulated DEGs only.

290

291 GO enrichment analysis of the DEGs meeting the threshold  $FDR < 0.05$  revealed 23 macro-  
292 categories in wild emmer, 21 in emmer and 25 in durum wheat (Supplementary Figure S4).  
293 The main differences between the three subspecies were observed for categories related to  
294 “signaling”, “regulation of biological process”, “developmental process”, and “metabolic  
295 process” Supplementary Table S5. We observed the uniform enrichment of GO categories

296 associated with upregulated genes in all three subspecies, including terms linked to N and  
297 amino acid metabolism as well as carbon metabolism and photosynthesis (Supplementary  
298 Table S5). In contrast, the enrichment of GO categories associated with downregulated genes  
299 was more selective, with some GO categories related to N metabolism enriched only in durum  
300 wheat, including GO:0006807 and GO:0034641 (N compound and cellular N compound  
301 metabolic process, respectively) and GO:0006536 “glutamate metabolic process”  
302 (Supplementary Table S5). Functional annotations of the most strongly modulated genes (top  
303 5%  $|\log_2FC|$  values) are reported in Supplementary Table S6.

304 Our data confirm, on a larger set of samples, earlier observations on the response of wheat to  
305 N starvation based on transcriptomics and metabolomics data<sup>36–38</sup>. These earlier studies  
306 included one emmer and one durum wheat genotype also present in our sample set (Beleggia  
307 et al., 2021), but also considered the durum wheat cultivar Svevo (Curci et al., 2017) and  
308 various bread wheat cultivars (Sultana et al., 2020). As expected, genes involved in N  
309 metabolism were modulated during N starvation. Among the key genes for N assimilation,  
310 those encoding asparagine synthetase and nitrite reductase were upregulated in every taxon,  
311 whereas those encoding glutamate carboxypeptidase and glutamate decarboxylase were  
312 downregulated. We observed contrasting profiles for genes encoding ureide permease  
313 (encoding a ureide transporter), which were strongly upregulated in all three subspecies in  
314 response to N stress, whereas genes encoding nitrate transporters were strongly downregulated.  
315 The modulated genes also included transporters of amino acids and other nutrients.

316 N starvation also influenced other metabolic pathways, revealing many further DEGs involved  
317 in C metabolism, especially fatty acid metabolism, glycolysis, photosynthesis and the  
318 tricarboxylic acid (TCA) cycle. About 10% of the highest-ranking DEGs represented  
319 transcription factors and protein kinases. The most common functional category (accounting  
320 for 17% of annotated DEGs) reflected the general stress response to N starvation, including the  
321 mitigation of oxidative stress and detoxification. Examples included genes encoding  
322 *cytochrome P450s*, *glutaredoxin family*, *glutathione S-transferases* and *peroxidases*  
323 (Supplementary Table S6).

324 To compare gene expression between the three taxa while taking the environmental effects into  
325 account, we also identified DEGs between each pair of subspecies under all N conditions.  
326 Accordingly, we compared emmer vs wild emmer (primary domestication, high and low N),  
327 durum wheat vs emmer (secondary domestication, high and low N) and durum wheat vs wild  
328 emmer (cumulative effect, high and low N) (Supplementary Figure S5). The wild emmer vs

329 emmer comparison revealed few DEGs regardless of N availability (12 and 11 DEGs under  
330 high and low N conditions, respectively), whereas the emmer *vs* durum wheat comparison  
331 revealed 41 DEGs associated with high N and 29 associated with N starvation, and the wild  
332 emmer *vs* durum wheat comparison revealed 46 DEGs associated with high N and only 10  
333 associated with N starvation. These data indicate that the number of DEGs increases during  
334 domestication but only when there is a sufficient N supply (Supplementary Figure S5).  
335 Interestingly, there were more upregulated than downregulated genes in all pairwise  
336 comparisons under high N conditions (~65%) but the proportion increased under N starvation  
337 conditions, particularly for the comparison of wild emmer *vs* durum wheat (90%). The  
338 preponderance of upregulated genes during domestication has also been observed in maize  
339 (Lemmon et al., 2014), whereas domestication was shown to increase the proportion of  
340 downregulated genes in common bean (Bellucci et al., 2014), egg-plant (Page et al., 2019) and  
341 sorghum (Burgarella et al., 2021) landraces compared to wild relatives. The absence of  
342 consistent patterns suggests that the evolution of domesticated phenotypes is driven by specific  
343 processes that are unique to each crop.

344 Among the 102 DEGs (Supplementary Table S7) found in at least one of the six pairwise  
345 comparisons between subspecies, 35 were also found among DEGs identified between  
346 contrasting N conditions and of which 24 were proposed to be under selection. Overall, six  
347 genes were identified in all three experiments (i.e., differentially expressed between subspecies  
348 and between contrasting N conditions, and showed evidence of selection).

349

### 350 **Selection shaped the expression profiles of genes modulated by nitrogen availability**

351 The 6,991 DEGs found in at least one species when comparing the contrasting N conditions  
352 included 101 putatively under selection, which are candidates for the adaptive response to N  
353 availability. We applied PCA to the normalized read counts in order to investigate if the  
354 different genotype groups can be separated based on their gene expression. Initially we  
355 incorporated all 6,991 DEGs (Figure 5a,b) before focusing on the subset of 101 DEGs that  
356 were also putatively under selection (Figure 5c,d). When considering all DEGs, PC1 did not  
357 completely separate the durum wheat genotypes from the other taxa, in contrast to the clear  
358 separation observed for the SNP data (Figure 1), and this was particularly evident during N  
359 starvation (Figure 5b). There was also a moderate degree of overlap between the wild emmer  
360 and emmer genotypes along PC2. However, when we focused on the DEGs under selection,

361 PC1 separated the durum wheat genotypes into a densely clustered group (as observed for the  
 362 SNP data) under both N conditions, and PC2 separated the wild emmer and emmer genotypes  
 363 more clearly, especially under high N conditions (Figure 5c,d).

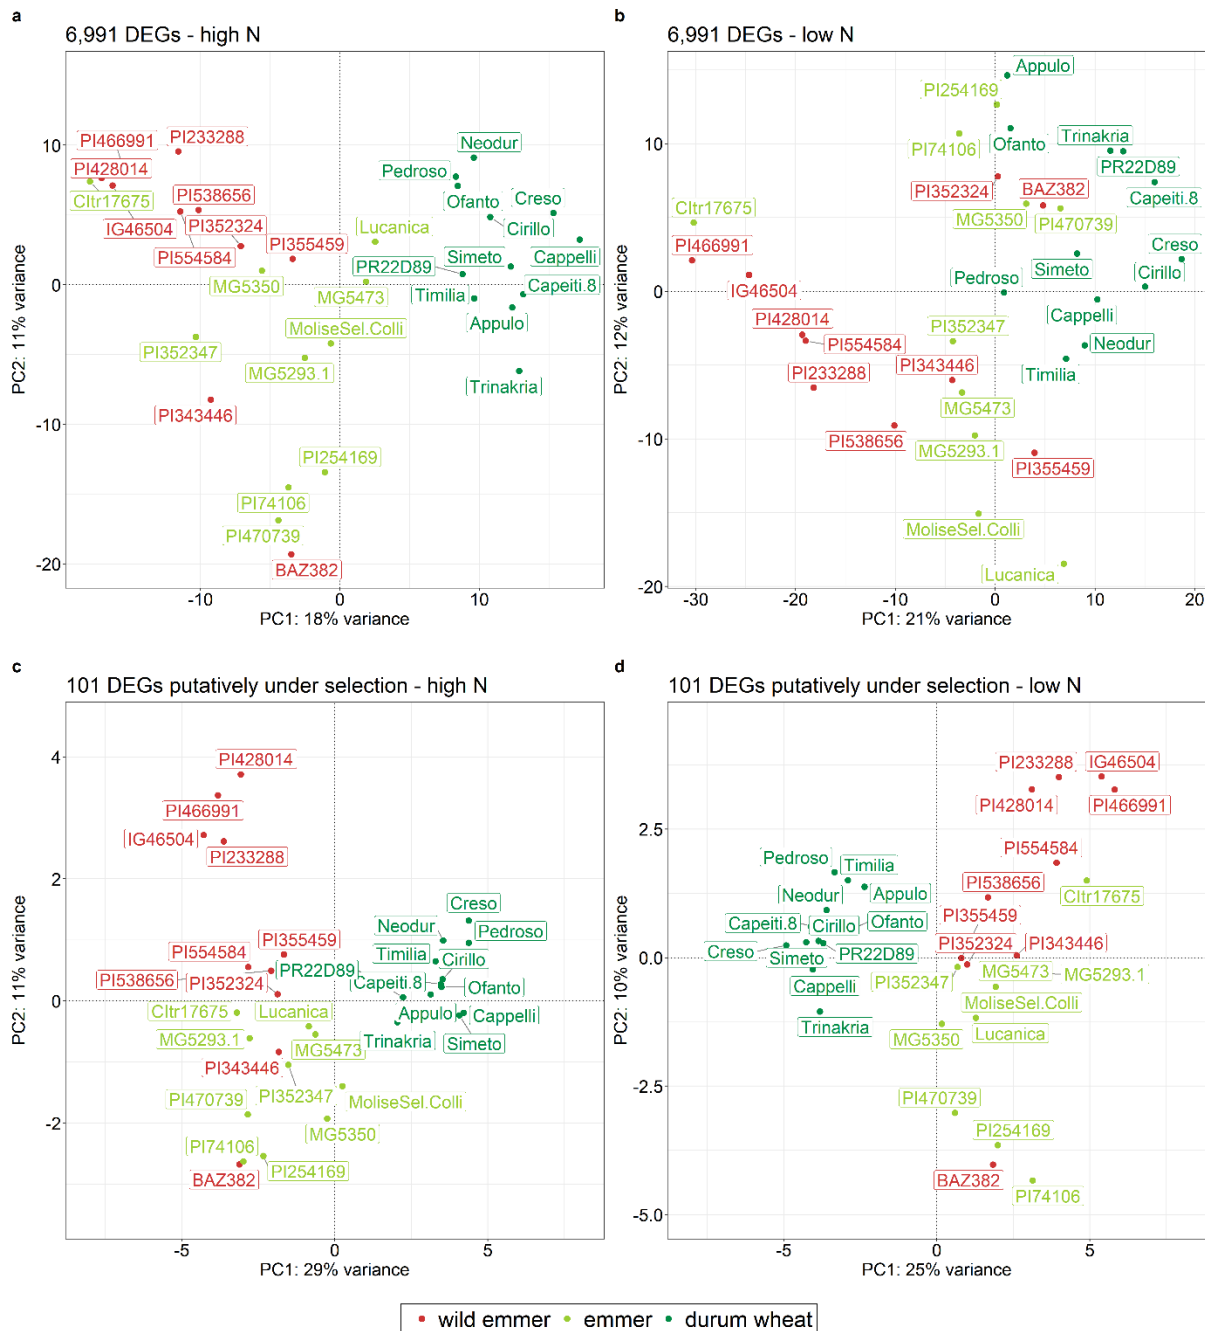

364

365 **Figure 5: Principal component analysis of differentially expressed genes when comparing**  
 366 **high and low nitrogen conditions within each subspecies. a,b** Plots based on all 6,991 DEGs  
 367 (not filtered): **a** high nitrogen conditions and **b** low nitrogen conditions. **c,d** Plots based on 101  
 368 DEGs that are also putatively under selection: **c** high nitrogen conditions and **d** low nitrogen

369 conditions. Samples are represented by taxa-based colored dots. Labels show the accession  
370 name of each genotype.

371

372 The integration of selection signatures (based on  $Q_{ST}/F_{ST}$  values) and differential expression  
373 analysis uncovered a set of 101 candidate genes that are interesting due to their potential roles  
374 in the domestication and diversification of cultivated wheat, specifically in relation to N  
375 availability. Functional annotation (Supplementary Table S8) revealed upregulated genes  
376 involved in carbon (C) metabolism as well as some transcription factors and transporters, as  
377 well as both upregulated and downregulated genes responsible for general stress responses and  
378 N metabolism, specifically those encoding enzymes involved in amino acid metabolism, such  
379 as methionine aminopeptidase, aspartokinase and glutamate dehydrogenase (GDH). The latter  
380 is particularly noteworthy because, in addition to its modulation in response to different N  
381 conditions and the presence of selection signatures, it was also upregulated in the comparison  
382 between wild emmer and durum wheat under high N conditions. GDH is a key enzyme  
383 involved in N metabolism and N/C balance (Mifflin and Habash, 2002). This is supported by  
384 the co-localization of quantitative trait loci for GDH activity and physiological traits associated  
385 with the flag leaf lamina, such as soluble protein and amino acid content, as well as flag leaf  
386 area and dry weight (Fontaine et al., 2009). Selection signatures were also identified in the  
387 *GDH* gene when comparing landraces with old and modern durum wheat cultivars (Taranto et  
388 al., 2020). Our results confirm that N metabolism has been a key driver during the evolutionary  
389 history of wheat, particularly the central role of glutamate in the process of domestication. This  
390 was also suggested by a combined transcriptomics and metabolomics study, showing that  
391 glutamate and  $\gamma$ -aminobutyric acid (mainly synthesized from glutamate) are central to the  
392 genotype-specific response of emmer and durum wheat to N starvation (Beleggia et al., 2021).

393

394 We have shown that significant changes occurred at the nucleotide and gene expression levels  
395 during the domestication of tetraploid wheat, taking into account the environmental variable of  
396 N availability. We confirmed that more nucleotide diversity has been lost during secondary  
397 domestication compared to primary domestication, and revealed a parallel trend in the loss of  
398 gene expression diversity associated to the domestication process, with a stronger effect due to  
399 secondary domestication and unveil a parallel different impact of primary and secondary  
400 domestication on the loss of expression diversity, which appears to be related to N availability



401 in the durum wheat selection environment. We present evidence that selection may have  
402 operated in different directions during primary and secondary domestication, the former  
403 involving changes related to biotic interactions and the latter related to amino acid metabolism.  
404 By screening a large number of genotypes, we found a major transcriptional response in durum  
405 wheat (compared to emmer and wild emmer) to changes in N availability. Finally, through the  
406 innovative combination of RNA-Seq analysis and the estimate of quantitative genetics  
407 parameters, we developed a pipeline to identify selection signatures and phenotypic plasticity  
408 in gene expression data based on evolvability and  $Q_{ST}/F_{ST}$  scores. Our findings, elucidating the  
409 role of N in tetraploid wheat domestication and adaptive response can guide the development  
410 of innovative strategies for crop improvement, resource use efficiency, and environmental  
411 sustainability.

412

## 413 **Materials and methods**

### 414 **Plant material and experimental design**

415 The study included 32 tetraploid wheat genotypes, comprising 10 accessions of wild emmer  
416 (*T. turgidum* ssp. *dicoccoides*), 10 accessions of emmer (*T. turgidum* ssp. *dicoccum*), and 12  
417 accessions of durum wheat (*T. turgidum* ssp. *durum*) (Supplementary Table S1). The samples  
418 we analysed were part of a larger experiment, conducted in October 2012 and described  
419 elsewhere (Gioia et al., 2015). Briefly, wheat genotypes were grown for 4 weeks under high  
420 nitrogen (N+) and nitrogen starvation (N-) conditions in the Phytec Experimental Greenhouse  
421 at the Institute of Biosciences and Geosciences (IBG-2), Plant Sciences Institute,  
422 Forschungszentrum Jülich GmbH, Germany (50°54'36" N, 06°24'49" E). Seeds of uniform  
423 size and mass were visually selected, surface sterilized (1% (w/v) NaClO for 15 min) and pre-  
424 germinated. After germination, seedlings showing uniform growth (seminal root length, 1–2  
425 cm) were transferred to soil-filled rhizoboxes, which were placed in the automated  
426 GROWSCREEN-Rhizo phenotyping system available at IBG-2. We used a Type 0 manually  
427 sieved peat soil (Nullerde Einheitserde; Balster Einheitserdewerk, Frondenberg, Germany),  
428 which provided low nutrient availability (ammonium N and nitrate N concentrations of < 1.0  
429 and < 1.0 mg l<sup>-1</sup>, respectively). All plants were watered twice daily with 400 ml of tap water  
430 and were supplied three times per week with 200 ml of modified Hoagland solution (Hoagland  
431 and Arnon, 1950) with or without added N. For the N starvation conditions, KNO<sub>3</sub> and  
432 Ca(NO<sub>3</sub>)<sub>2</sub> were replaced with K<sub>2</sub>SO<sub>4</sub> and CaCl<sub>2</sub>·6(H<sub>2</sub>O), respectively. The experiment was

433 carried out under natural lighting in the greenhouse, with an air temperature of 18–24 °C and  
434 a relative humidity of 40–60%. For each N treatment, we used two replicates of each genotype  
435 with two plants per replicate (four plants per genotype in total). After 4 weeks, leaves were  
436 pooled from two plants of the same genotype growing in the same rhizobox. Accordingly, four  
437 independent biological replicates (two replicates per N condition) were produced for each  
438 genotype, with the exception of wild emmer IG 46504, PI 233288, PI 466991, PI 538656,  
439 emmer MG 5293/1, and durum wheat Creso, Pedroso and Trinakria, for which only three  
440 replicates were available, and emmer Molise Sel. Colli and durum wheat Simeto, for which  
441 eight replicates were available. The tissues were immediately frozen in liquid N<sub>2</sub> and stored at  
442 –80 °C. Further details of the experiment and growth conditions are provided elsewhere (Gioia  
443 et al., 2015).

#### 444 **RNA extraction and sequencing**

445 RNA was extracted from 100 mg of frozen ground leaves per replicate using the Spectrum  
446 Plant Total RNA kit (Sigma-Aldrich, St Louis, MO, USA) followed by treatment with RNase-  
447 free DNase using the On-Column DNase I Digestion Set (Sigma-Aldrich). RNA integrity and  
448 purity were assessed by agarose gel electrophoresis and a Bioanalyzer 2100, respectively  
449 (Agilent/Bonsai Technologies, Santa Clara, CA, USA). Only RNA samples with an RNA  
450 integrity number > 8.0 were considered suitable for analysis.

451 Library construction and RNA sequencing were carried out using the Illumina mRNA-Seq  
452 platform at the Montpellier Genomix sequencing facility (<http://www.mgx.cnrs.fr>) as  
453 previously described (David et al., 2014). Briefly, RNA samples were processed using TruSeq  
454 RNA sample preparation kits v2 (Illumina, San Diego, CA, USA). Libraries were quantified  
455 by real-time PCR using the KAPA Library Quantification Kit for Illumina Sequencing  
456 Platforms (Roche, Basel, Switzerland), followed by quality control using a DNA 100 Chip on  
457 a Bioanalyzer 2100. Cluster generation and sequencing were carried out using the Illumina  
458 HiSeq 2000 instrument and TruSeq PE Cluster Kit v3, following the Illumina  
459 PE\_Amp\_Lin\_Block\_V8.0 recipe, and Illumina TruSeq PE Cluster v3-cBot-HS kits with the  
460 2 × 100 cycles, paired-end, indexed protocol, respectively (David et al., 2014).

#### 461 **RNA-Seq library processing and mapping**

462 We pre-processed 128 raw paired-end RNA-Seq libraries (David et al., 2014). Cutadapt  
463 (Martin, 2011) was then used to remove adaptor sequences and trim the end of reads with low  
464 quality scores (parameter -q 20) while keeping reads with a minimum length of 35 bp. Reads

465 with a mean quality score < 30 were discarded, and orphan reads (whose mates were discarded  
466 in the previous filtering steps) were removed (David et al., 2014). The final quality of trimmed  
467 and filtered reads was assessed using FastQC (Andrews, 2014).

468 The bread wheat (*Triticum aestivum* cv. Chinese Spring) genome assembly IWGSC RefSeq  
469 v2.1, along with the corresponding genome annotation, were downloaded from the IWGSC  
470 data repository hosted by URGI-INRAE (<https://wheat-urgi.versailles.inra.fr/>) and used as a  
471 reference to map each cleaned library to the A and B sub-genomes. The bread wheat genome  
472 was chosen deliberately to ensure the inclusion of an outgroup species that is closely related to  
473 the subspecies in the panel. By doing so, we aimed to avoid bias that could arise from selecting  
474 only one subspecies among our panel of accessions. We have confidence in this strategy  
475 because the *T. aestivum* A and B subgenomes are derived from the tetraploid species included  
476 in the study.

477 STAR v2.7.0e (Dobin et al., 2013) was used for read mapping with the --quantMode  
478 TranscriptomeSAM and --quantTranscriptomeBan Singleend options. The output alignments  
479 were translated into transcript coordinates (in addition to alignments in genomic coordinates),  
480 allowing insertions, deletions and soft-clips in the transcriptomic alignments. The  
481 transcriptomic alignments were used as inputs for salmon v1.6.0 (Patro et al., 2017) to quantify  
482 gene expression. Raw read counts were computed for all genes in each sample and, to filter out  
483 weakly-expressed transcripts, only genes with at least 1 count per million (CPM) in at least 10  
484 samples (of the same subspecies) were retained. This was calculated separately in each of the  
485 three subspecies and the raw counts of the filtered genes in each subspecies were then combined  
486 for downstream analysis, for a total of 32,358 genes (Supplementary Table S2).

#### 487 **Variant identification**

488 Variants were called by applying BCFtools v1.15 (previously SAMtools) (Danecek et al.,  
489 2021) to the alignment bam files. The “*bcftools mpileup*” command was used to determine the  
490 genotype likelihoods at each genomic position, with a minimum alignment quality of 20 and a  
491 minimum base quality of 30. The actual calls were obtained using the “*bcftools call*” command.  
492 The resulting VCF file was filtered using the “*bcftools view*” command, removing indels and  
493 keeping only sites covered by at least three reads in all genotypes. Subsequently, only biallelic  
494 SNPs with maximum values of 50% missingness and a 1% minor allele frequency were  
495 retained. To identify private and shared SNPs among the different subspecies, every possible

496 comparison of the three subsampled VCF files (wild emmer, emmer and durum wheat) was  
497 carried out using the “*bcftools isec*” command.

#### 498 **Population genetics analysis**

499 Variants were filtered (one SNP per 500 kb) using the VCFtools *--thin 500000* option (v0.1.17)  
500 (Danecek et al., 2011) and then converted into ped format with PLINK (v1.90p) (Purcell et al.,  
501 2007). PLINK was also used to compute genetic distances between individuals with the *--*  
502 *distance-matrix* flag. The output matrix was used as input for PCA with the *cmdscale* function  
503 of R (v4.2.1) (R Core Team, 2022).

504 Genetic diversity statistics, including nucleotide diversity ( $\pi$  and  $\theta$ ) (Tajima, 1983; Watterson,  
505 1975) were computed on the alignment bam files for each subspecies, from the folded site  
506 frequency spectra using ANGSD (Korneliussen et al., 2014). First, the *doSaf* function was used  
507 to estimate per-site allele frequencies (Saf) then *realSFS* was used to get the site frequency  
508 spectra. The statistical loss of diversity (Vigouroux et al., 2002) was used to test the impact of  
509 primary and secondary domestication on the molecular diversity of the three subspecies. For  
510 primary domestication, the statistic was computed as  $[1 - (x_{\text{emmer}}/x_{\text{wild}})]$ , where  $x_{\text{emmer}}$  and  $x_{\text{wild}}$   
511 are the diversities in emmer and wild emmer, respectively, measured using  $\pi$ ,  $\theta$  and D. If  $x_{\text{emmer}}$   
512 was higher than  $x_{\text{wild}}$ , then the parameter was calculated as  $[(x_{\text{wild}}/x_{\text{emmer}}) - 1]$ . The loss of  
513 diversity due to secondary domestication in durum wheat versus emmer was calculated as  $[1 -$   
514  $(x_{\text{durum}}/x_{\text{emmer}})]$ , where  $x_{\text{durum}}$  and  $x_{\text{emmer}}$  are the diversities in durum wheat and emmer,  
515 respectively. If  $x_{\text{durum}}$  was higher than  $x_{\text{emmer}}$ , then the parameter was calculated as  
516  $[(x_{\text{emmer}}/x_{\text{durum}}) - 1]$ .

517 We calculated  $F_{ST}$  for each pair of populations using ANGSD (Korneliussen et al., 2014). Saf  
518 and 2D SFS were calculated as for nucleotide diversity, then the *fst index* function was used to  
519 obtain the global estimate. To get an  $F_{ST}$  value for each gene in our dataset, we used the *fst*  
520 *print* function, which prints the posterior expectation of genetic variance between populations  
521 (called A), and total expected variance (called B) for every locus. We then computed the  
522 weighted  $F_{ST}$  as the ratio of the summed As and summed Bs for every gene region, using an *ad*  
523 *hoc* R script.

#### 524 **Expression profiles, heritability and $Q_{ST}$ analysis**

525 Raw read counts of the 32,358 genes were normalized using the *vst* method allowing the  
526 additive coefficient of variation ( $CV_A$ ) (standard deviation/mean) to be calculated for the two  
527 N conditions in every subspecies, averaging the biological replicates of every genotype. The

528 statistical loss approach (Vigouroux et al., 2002) was then applied to test the loss of expression  
529 diversity in the different groups, as previously reported (Bellucci et al., 2014). The statistical  
530 significance of the differences between each  $CV_A$  value and the percentage loss of expression  
531 diversity was determined using the Mann-Whitney test in R (v4.2.1) (R Core Team, 2022) with  
532 the function *wilcox.test*.

533 To compute heritability, the raw counts of each subspecies under each condition were first  
534 normalized using the trimmed mean M-values normalization method in the R package  
535 edgeR (Robinson et al., 2010) and the voom normalization method in the R package  
536 limma (Smyth, 2005). To determine the variance component of each factor and heritability, the  
537 following model was considered:

$$538 \quad Y_{ijkl} = S_i + G_{j(i)} + N_k + (S \times N)_{ik} + (G \times N)_{jk(i)} + \varepsilon_{l(ijk)},$$

539 where  $Y_{ijkl}$  is the normalized gene expression level,  $S_i$  is the species factor,  $G_{j(i)}$  is the genotype  
540 factor nested in species,  $N_k$  is the N level factor,  $(S \times N)_{ik}$  is the interaction between species  
541 and N levels,  $(G \times N)_{jk(i)}$  is the interaction between genotypes and N levels, and  $\varepsilon_{l(ijk)}$  is the  
542 residual error. All factors were treated as random effects in the model except the intercept,  
543 which was a fixed effect. The linear mixed models were fitted using the *lmer* function in R  
544 package lme4 based on the normalized data of each transcript (Bates et al., 2015). The  
545 heritability ( $H^2$ ) was calculated as  $H^2 = \frac{V_S + V_G}{V_A}$ , where  $V_A = V_S + V_G + V_N + \frac{V_{S \times N}}{n} + \frac{V_{G \times N}}{n} + \frac{V_\varepsilon}{n}$ ,  
546  $V_S$  is the variance of species,  $V_G$  is the variance of genotype,  $V_N$  is the variance of N level,  $V_{S \times N}$   
547 is the variance of species and N level interaction,  $V_{G \times N}$  is the variance of genotype and N level  
548 interaction,  $V_\varepsilon$  is the residual variance, and  $n$  is the number of N levels.  $V_{S \times N}$  and  $V_{G \times N}$  represent  
549 the genotype  $\times$  environment interaction variance components at the species and genotype  
550 (nested in species) levels, respectively.

551  $Q_{ST}$  was calculated between pairs of the three subspecies under low and high N levels  
552 separately. The wild emmer vs emmer comparison revealed the effects of primary  
553 domestication, the emmer vs durum wheat comparison revealed the effects of secondary  
554 domestication, and the wild emmer vs durum wheat comparison revealed the cumulative effect  
555 of domestication. To this end, the model can be reduced to  $Y_{ijl} = S_i + G_{j(i)} + \varepsilon_{l(ij)}$  at each N  
556 level. The  $Q_{ST}$  value was calculated as  $Q_{ST} = \frac{V_S}{V_S + V_G}$ , the ratio of between-species and within-  
557 species variance.

558  $Q_{ST}$  distributions were used to perform a “selection scan” on a restricted number of genes. First,  
559 genes were filtered for  $H^2 \geq 0.7$  and, in order not to lose genes whose expression was strongly  
560 influenced by N availability, also the species  $\times$  environment ( $S \times N$ ) variance component was  
561 evaluated (i.e., every species subgroup  $\times$  N condition), retaining those genes meeting the  
562 threshold  $S \times N \geq 0.2$  (Supplementary Figure S1). Successively, we obtained six different  $Q_{ST}$   
563 value distributions ( $Q_{ST}$  WILD EMMER vs EMMER,  $Q_{ST}$  EMMER vs DURUM WHEAT and  $Q_{ST}$  WILD EMMER vs  
564 DURUM WHEAT, each for high and low N conditions) and we retained the 5% upper tail of every  
565 distribution. Finally, we compared  $F_{ST}$  and  $Q_{ST}$  values for every gene, discarding  $F_{ST}$  values  $<$   
566 0.01. We confirmed that every retained gene satisfied the condition  $Q_{ST} > F_{ST}$  allowing it to be  
567 classed as undergoing directional selection.

### 568 **Differential expression analysis**

569 Differential gene expression was assessed by analysing the pre-processed raw count dataset  
570 (32,358 genes). We identified DEGs by comparing (i) two conditions (i.e., high and low N  
571 levels) within each subspecies, and (ii) pairs of the three subspecies under the same N levels,  
572 which considered the genotypes nested in species. For the two scenarios, we used three  
573 different approaches to detect DEGs: one linear model-based approach implemented in the R  
574 package limma (Smyth, 2005), and two Poisson model-based approaches implemented in the  
575 R packages edgeR (Robinson et al., 2010) and DESeq2 (Love et al., 2014). In all approaches,  
576 the normalization of raw counts was applied by default in the package before differential  
577 analysis. To reduce the number of false positives, the intersection of DEGs resulting from the  
578 three approaches was retained (Zhang et al., 2014; Rapaport et al., 2013) and the significance  
579 threshold was set to an adjusted p-value  $< 0.001$ . The DEGs between high and low N levels in  
580 at least one subspecies were used for PCA following the *DESeq2* approach (Love et al., 2014),  
581 first using all the DEGs, then repeating the analysis on the DEGs considered to be under  
582 selection. At each step, counts were normalized using the *vst* method before the *plotPCA*  
583 function was applied to define principal components 1 and 2 for the two N levels separately.

### 584 **GO enrichment analysis**

585 Enriched terms in the DEGs and genes under selection were identified using agriGO (v.2.0)  
586 (Tian et al., 2017) with *T. aestivum* reference annotations and the following parameters:  
587 hypergeometric test, multiple hypothesis test adjustment according to the Hochberg FDR  
588 procedure at significance level  $< 0.05$  and minimum number of mapping entries of 3.

589

590 **Data availability:** The raw sequence reads generated and analysed in this study have been  
591 deposited in the Sequence Read Archive (SRA) of the National Center of Biotechnology  
592 Information (NCBI) under BioProject number PRJNA1015013.

593

594 **Acknowledgements:** This work was financially supported by Università Politecnica delle  
595 Marche, by the PON a3 PIASS Project. PIASS -Platform for Agrofood Science and Safety and  
596 by the Transnational Access capacities of the European Plant Phenotyping Network (EPPN,  
597 grant n. 284443) funded by the FP7 Research Infrastructures Program of the European Union.  
598 H.T. and Z.N. were funded by the European Union's Horizon 2020 research and innovation  
599 program through grant n. 862201.

600

601 **Author contributions:** R.P. and R.B. conceived and designed the study. T.G. and F.F. carried  
602 out the experiments; J.L.D. carried out the library preparation and sequencing. A.P. performed  
603 the RNA-Seq analysis. A.P., H.T. and Z.N. performed the bioinformatics analysis and analysed  
604 the data. C.D.Q, A.R.L, M.R. provided technical support for RNA-Seq analysis. A.P., R.B.,  
605 R.P. wrote the paper. Z.N., U.S., V.D.V., G.F., E.Bi., L.N., E.Be., N.P., P.D.V. reviewed and  
606 contributed to the editing of the manuscript. All authors have read and approved the  
607 manuscript.

608

609 **Declaration of interests:** The authors declare no competing interests.

610

## 611 **References**

612 Alaux, M. et al. (2018). Linking the International Wheat Genome Sequencing Consortium  
613 bread wheat reference genome sequence to wheat genetic and phenomic data. *Genome*  
614 *Biol.* 19: 1–10.

615 Alseekh, S., Scossa, F., Wen, W., Luo, J., Yan, J., Beleggia, R., Klee, H.J., Huang, S., Papa,  
616 R., and Fernie, A.R. (2021). Domestication of Crop Metabolomes: Desired and  
617 Unintended Consequences. *Trends Plant Sci.* 26: 650–661.

618 Anderson, O.D., Coleman-Derr, D., Gu, Y.Q., and Heath, S. (2010). Structural and  
619 transcriptional analysis of plant genes encoding the bifunctional lysine ketoglutarate

- 620 reductase saccharopine dehydrogenase enzyme. *BMC Plant Biol.* 10: 113.
- 621 Andrews, S. (2014). FastQC A Quality Control tool for High Throughput Sequence Data -  
622 Babraham Bioinformatics.
- 623 Arruda, P., Kemper, E.L., Papes, F., and Leite, A. (2000). Regulation of lysine catabolism in  
624 higher plants. *Trends Plant Sci.* 5: 324–330.
- 625 Barneix, A.J. (2007). Physiology and biochemistry of source-regulated protein accumulation  
626 in the wheat grain. *J. Plant Physiol.* 164: 581–590.
- 627 Bates, D., Mächler, M., Bolker, B., and Walker, S. (2015). Fitting Linear Mixed-Effects  
628 Models Using lme4. *J. Stat. Softw.* 67: 1–48.
- 629 Beleggia, R., Omranian, N., Holtz, Y., Gioia, T., Fiorani, F., Nigro, F.M., Pecchioni, N., De  
630 Vita, P., Schurr, U., David, J.L., Nikoloski, Z., and Papa, R. (2021). Comparative  
631 Analysis Based on Transcriptomics and Metabolomics Data Reveal Differences between  
632 Emmer and Durum Wheat in Response to Nitrogen Starvation. *Int. J. Mol. Sci.* 22: 4790.
- 633 Beleggia, R., Rau, D., Laido, G., Platani, C., Nigro, F., Fragasso, M., De Vita, P., Scossa, F.,  
634 Fernie, A.R., Nikoloski, Z., and Papa, R. (2016). Evolutionary metabolomics reveals  
635 domestication-associated changes in tetraploid wheat kernels. *Mol. Biol. Evol.* 33:  
636 1740–1753.
- 637 Bellucci, E. et al. (2014). Decreased Nucleotide and Expression Diversity and Modified  
638 Coexpression Patterns Characterize Domestication in the Common Bean. *Plant Cell* 26:  
639 1901–1912.
- 640 Bijay-Singh and Craswell, E. (2021). Fertilizers and nitrate pollution of surface and ground  
641 water: an increasingly pervasive global problem. *SN Appl. Sci.* 2021 34 3: 1–24.
- 642 Bitocchi, E., Rau, D., Bellucci, E., Rodriguez, M., Murgia, M.L., Gioia, T., Santo, D., Nanni,  
643 L., Attene, G., and Papa, R. (2017). Beans (*Phaseolus* spp.) as a model for understanding  
644 crop evolution. *Front. Plant Sci.* 8: 722.
- 645 Burgarella, C., Berger, A., Glémin, S., David, J., Terrier, N., Deu, M., and Pot, D. (2021).  
646 The Road to Sorghum Domestication: Evidence From Nucleotide Diversity and Gene  
647 Expression Patterns. *Front. Plant Sci.* 12: 666075.
- 648 Chapman, M.A., Pashley, C.H., Wenzler, J., Hvala, J., Tang, S., Knapp, S.J., and Burke, J.M.  
649 (2008). A Genomic Scan for Selection Reveals Candidates for Genes Involved in the



- 650 Evolution of Cultivated Sunflower (*Helianthus annuus*). *Plant Cell* 20: 2931.
- 651 Cíván, P., Ivaničová, Z., and Brown, T.A. (2013). Reticulated Origin of Domesticated Emmer  
652 Wheat Supports a Dynamic Model for the Emergence of Agriculture in the Fertile  
653 Crescent. *PLoS One* 8: e81955.
- 654 Curci, P.L., Aiese Cigliano, R., Zuluaga, D.L., Janni, M., Sanseverino, W., and Sonnante, G.  
655 (2017). Transcriptomic response of durum wheat to nitrogen starvation. *Sci. Rep.* 7: 1–  
656 14.
- 657 Danecek, P., Auton, A., Abecasis, G., Albers, C.A., Banks, E., DePristo, M.A., Handsaker,  
658 R.E., Lunter, G., Marth, G.T., Sherry, S.T., McVean, G., and Durbin, R. (2011). The  
659 variant call format and VCFtools. *Bioinformatics* 27: 2156.
- 660 Danecek, P., Bonfield, J.K., Liddle, J., Marshall, J., Ohan, V., Pollard, M.O., Whitwham, A.,  
661 Keane, T., McCarthy, S.A., Davies, R.M., and Li, H. (2021). Twelve years of SAMtools  
662 and BCFtools. *Gigascience* 10: 1–4.
- 663 David, J., Holtz, Y., Ranwez, V., Santoni, S., Sarah, G., Ardisson, M., Poux, G., Choulet, F.,  
664 Genthon, C., Roumet, P., and Tavaud-Pirra, M. (2014). Genotyping by sequencing  
665 transcriptomes in an evolutionary pre-breeding durum wheat population. *Mol. Breed.*  
666 34: 1531–1548.
- 667 Dobin, A., Davis, C.A., Schlesinger, F., Drenkow, J., Zaleski, C., Jha, S., Batut, P., Chaisson,  
668 M., and Gingeras, T.R. (2013). STAR: ultrafast universal RNA-seq aligner.  
669 *Bioinformatics* 29: 15–21.
- 670 Fontaine, J.X., Ravel, C., Pageau, K., Heumez, E., Dubois, F., Hirel, B., and Le Gouis, J.  
671 (2009). A quantitative genetic study for elucidating the contribution of glutamine  
672 synthetase, glutamate dehydrogenase and other nitrogen-related physiological traits to  
673 the agronomic performance of common wheat. *Theor. Appl. Genet.* 119: 645–662.
- 674 Frizzi, A., Huang, S., Gilbertson, L.A., Armstrong, T.A., Luethy, M.H., and Malvar, T.M.  
675 (2008). Modifying lysine biosynthesis and catabolism in corn with a single bifunctional  
676 expression/silencing transgene cassette. *Plant Biotechnol. J.* 6: 13–21.
- 677 Garcia-Gonzalez, F., Simmons, L.W., Tomkins, J.L., Kotiaho, J.S., and Evans, J.P. (2012).  
678 COMPARING EVOLVABILITIES: COMMON ERRORS SURROUNDING THE  
679 CALCULATION AND USE OF COEFFICIENTS OF ADDITIVE GENETIC  
680 VARIATION. *Evolution* (N. Y). 66: 2341–2349.

- 681 Gioia, T., Nagel, K.A., Beleggia, R., Fragasso, M., Ficco, D.B.M., Pieruschka, R., De Vita,  
682 P., Fiorani, F., and Papa, R. (2015). Impact of domestication on the phenotypic  
683 architecture of durum wheat under contrasting nitrogen fertilization. *J. Exp. Bot.* 66:  
684 5519–5530.
- 685 Hansen, T.F., Pélabon, C., and Houle, D. (2011). Heritability is not Evolvability. *Evol. Biol.*  
686 2011 383 38: 258–277.
- 687 Hawkesford, M.J. and Griffiths, S. (2019). Exploiting genetic variation in nitrogen use  
688 efficiency for cereal crop improvement. *Curr. Opin. Plant Biol.* 49: 35–42.
- 689 Hoagland, D.R. and Arnon, D.I. (1950). The water-culture method for growing plants without  
690 soil. *Circ. Calif. Agric. Exp. Stn.* 347.
- 691 Houle, D. (1992). Comparing evolvability and variability of quantitative traits. *Genetics* 130:  
692 195–204.
- 693 Houmard, N.M., Mainville, J.L., Bonin, C.P., Huang, S., Luethy, M.H., and Malvar, T.M.  
694 (2007). High-lysine corn generated by endosperm-specific suppression of lysine  
695 catabolism using RNAi. *Plant Biotechnol. J.* 5: 605–614.
- 696 Howarth, J.R. et al. (2008). Co-ordinated expression of amino acid metabolism in response to  
697 N and S deficiency during wheat grain filling. *J. Exp. Bot.* 59: 3675–3689.
- 698 Kavi Kishor, P.B., Suravajhala, P., Rathnagiri, P., and Sreenivasulu, N. (2022). Intriguing  
699 Role of Proline in Redox Potential Conferring High Temperature Stress Tolerance.  
700 *Front. Plant Sci.* 13: 867531.
- 701 Korneliussen, T.S., Albrechtsen, A., and Nielsen, R. (2014). ANGSD: Analysis of Next  
702 Generation Sequencing Data. *BMC Bioinformatics* 15: 1–13.
- 703 Laidò, G., Mangini, G., Taranto, F., Gadaleta, A., Blanco, A., Cattivelli, L., Marone, D.,  
704 Mastrangelo, A.M., Papa, R., and De Vita, P. (2013). Genetic Diversity and Population  
705 Structure of Tetraploid Wheats (*Triticum turgidum* L.) Estimated by SSR, DArT and  
706 Pedigree Data. *PLoS One* 8: e67280.
- 707 Laitinen, R.A.E. and Nikoloski, Z. (2019). Genetic basis of plasticity in plants. *J. Exp. Bot.*  
708 70: 795–804.
- 709 Leinonen, T., McCairns, R.J.S., O’Hara, R.B., and Merilä, J. (2013). QST -FST comparisons:  
710 Evolutionary and ecological insights from genomic heterogeneity. *Nat. Rev. Genet.* 14:

- 711 179–190.
- 712 Lemmon, Z.H., Bukowski, R., Sun, Q., and Doebley, J.F. (2014). The Role of cis Regulatory  
713 Evolution in Maize Domestication. *PLOS Genet.* 10: e1004745.
- 714 Liu, W., Chen, L., Zhang, S., Hu, F., Wang, Z., Lyu, J., Wang, B., Xiang, H., Zhao, R., Tian,  
715 Z., Ge, S., and Wang, W. (2019). Decrease of gene expression diversity during  
716 domestication of animals and plants. *BMC Evol. Biol.* 19: 1–11.
- 717 Long, X., Liu, Q., Chan, M., Wang, Q., and Sun, S.S.M. (2013). Metabolic engineering and  
718 profiling of rice with increased lysine. *Plant Biotechnol. J.* 11: 490–501.
- 719 Love, M.I., Huber, W., and Anders, S. (2014). Moderated estimation of fold change and  
720 dispersion for RNA-seq data with DESeq2. *Genome Biol.* 15: 550.
- 721 Luo, M.C., Yang, Z.L., You, F.M., Kawahara, T., Waines, J.G., and Dvorak, J. (2007). The  
722 structure of wild and domesticated emmer wheat populations, gene flow between them,  
723 and the site of emmer domestication. *Theor. Appl. Genet.* 114: 947–959.
- 724 Martín-Robles, N., Lehmann, A., Seco, E., Aroca, R., Rillig, M.C., and Milla, R. (2018).  
725 Impacts of domestication on the arbuscular mycorrhizal symbiosis of 27 crop species.  
726 *New Phytol.* 218: 322–334.
- 727 Martin, M. (2011). Cutadapt removes adapter sequences from high-throughput sequencing  
728 reads. *EMBnet.journal* 17: 10.
- 729 Mazzucotelli, E. et al. (2020). The Global Durum Wheat Panel (GDP): An International  
730 Platform to Identify and Exchange Beneficial Alleles. *Front. Plant Sci.* 11: 2036.
- 731 Michaletti, A., Naghavi, M.R., Toorchi, M., Zolla, L., and Rinalducci, S. (2018).  
732 Metabolomics and proteomics reveal drought-stress responses of leaf tissues from  
733 spring-wheat. *Sci. Reports* 2018 8: 1–18.
- 734 Miflin, B.J. and Habash, D.Z. (2002). The role of glutamine synthetase and glutamate  
735 dehydrogenase in nitrogen assimilation and possibilities for improvement in the nitrogen  
736 utilization of crops. *J. Exp. Bot.* 53: 979–987.
- 737 Oliveira, H.R., Jacocks, L., Czajkowska, B.I., Kennedy, S.L., and Brown, T.A. (2020).  
738 Multiregional origins of the domesticated tetraploid wheats. *PLoS One* 15: e0227148.
- 739 Page, A., Gibson, J., Meyer, R.S., and Chapman, M.A. (2019). Eggplant Domestication:  
740 Pervasive Gene Flow, Feralization, and Transcriptomic Divergence. *Mol. Biol. Evol.* 36:

- 741 1359–1372.
- 742 Patro, R., Duggal, G., Love, M.I., Irizarry, R.A., and Kingsford, C. (2017). Salmon provides  
743 fast and bias-aware quantification of transcript expression. *Nat. Methods* 14: 14:  
744 417–419.
- 745 Plett, D.C., Holtham, L.R., Okamoto, M., and Garnett, T.P. (2018). Nitrate uptake and its  
746 regulation in relation to improving nitrogen use efficiency in cereals. *Semin. Cell Dev.*  
747 *Biol.* 74: 97–104.
- 748 Porter, S.S. and Sachs, J.L. (2020). Agriculture and the Disruption of Plant–Microbial  
749 Symbiosis. *Trends Ecol. Evol.* 35: 426–439.
- 750 Purcell, S., Neale, B., Todd-Brown, K., Thomas, L., Ferreira, M.A.R., Bender, D., Maller, J.,  
751 Sklar, P., De Bakker, P.I.W., Daly, M.J., and Sham, P.C. (2007). PLINK: A Tool Set for  
752 Whole-Genome Association and Population-Based Linkage Analyses. *Am. J. Hum.*  
753 *Genet.* 81: 559.
- 754 R Core Team (2022). R: A language and environment for statistical computing. R Foundation  
755 Statistical Computing.
- 756 Rapaport, F., Khanin, R., Liang, Y., Pirun, M., Krek, A., Zumbo, P., Mason, C.E., Socci,  
757 N.D., and Betel, D. (2013). Comprehensive evaluation of differential gene expression  
758 analysis methods for RNA-seq data. *Genome Biol* 14: R95.
- 759 Robinson, M.D., McCarthy, D.J., and Smyth, G.K. (2010). edgeR: a Bioconductor package  
760 for differential expression analysis of digital gene expression data. *Bioinformatics* 26:  
761 139–40.
- 762 Sauvage, C., Rau, A., Aichholz, C., Chadoeuf, J., Sarah, G., Ruiz, M., Santoni, S., Causse,  
763 M., David, J., and Glémin, S. (2017). Domestication rewired gene expression and  
764 nucleotide diversity patterns in tomato. *Plant J.* 91: 631–645.
- 765 Savary, S., Willocquet, L., Pethybridge, S.J., Esker, P., McRoberts, N., and Nelson, A.  
766 (2019). The global burden of pathogens and pests on major food crops. *Nat. Ecol. Evol.*  
767 2019 3: 430–439.
- 768 Sawers, R.J.H., Ramírez-Flores, M.R., Olalde-Portugal, V., and Paszkowski, U. (2018). The  
769 impact of domestication and crop improvement on arbuscular mycorrhizal symbiosis in  
770 cereals: insights from genetics and genomics. *New Phytol.* 220: 1135–1140.

- 771 Smyth, G.K. (2005). limma: Linear Models for Microarray Data. *Bioinforma. Comput. Biol.*  
772 *Solut. Using R Bioconductor*: 397–420.
- 773 Sultana, N., Islam, S., Juhasz, A., Yang, R., She, M., Alhabbar, Z., Zhang, J., and Ma, W.  
774 (2020). Transcriptomic Study for Identification of Major Nitrogen Stress Responsive  
775 Genes in Australian Bread Wheat Cultivars. *Front. Genet.* 11: 583785.
- 776 Swanson-Wagner, R., Briskine, R., Schaefer, R., Hufford, M.B., Ross-Ibarra, J., Myers, C.L.,  
777 Tiffin, P., and Springer, N.M. (2012). Reshaping of the maize transcriptome by  
778 domestication. *Proc. Natl. Acad. Sci. U. S. A.* 109: 11878–11883.
- 779 Tajima, F. (1983). Evolutionary relationship of DNA sequences in finite populations.  
780 *Genetics* 105: 437–460.
- 781 Taranto, F., D’Agostino, N., Rodriguez, M., Pavan, S., Minervini, A.P., Pecchioni, N., Papa,  
782 R., and De Vita, P. (2020). Whole Genome Scan Reveals Molecular Signatures of  
783 Divergence and Selection Related to Important Traits in Durum Wheat Germplasm.  
784 *Front. Genet.* 11: 217.
- 785 Tian, T., Liu, Y., Yan, H., You, Q., Yi, X., Du, Z., Xu, W., and Su, Z. (2017). agriGO v2.0: a  
786 GO analysis toolkit for the agricultural community, 2017 update. *Nucleic Acids Res.* 45:  
787 W122–W129.
- 788 Valente, J., Gerin, F., Mini, A., Richard, R., Gouis, J. Le, Prigent-Combaret, C., and Moënné-  
789 Loccoz, Y. (2023). Symbiotic Variations among Wheat Genotypes and Detection of  
790 Quantitative Trait Loci for Molecular Interaction with Auxin-Producing *Azospirillum*  
791 PGPR. *Microorg.* 2023, Vol. 11, Page 1615 11: 1615.
- 792 Vigouroux, Y., McMullen, M., Hittinger, C.T., Houchins, K., Schulz, L., Kresovich, S.,  
793 Matsuoka, Y., and Doebley, J. (2002). Identifying genes of agronomic importance in  
794 maize by screening microsatellites for evidence of selection during domestication. *Proc.*  
795 *Natl. Acad. Sci. U. S. A.* 99: 9650–9655.
- 796 Watterson, G.A. (1975). On the number of segregating sites in genetical models without  
797 recombination. *Theor. Popul. Biol.* 7: 256–276.
- 798 Zhang, Z.H., Jhaveri, D.J., Marshall, V.M., Bauer, D.C., Edson, J., Narayanan, R.K.,  
799 Robinson, G.J., Lundberg, A.E., Bartlett, P.F., Wray, N.R., and Zhao, Q.-Y. (2014). A  
800 comparative study of techniques for differential expression analysis on RNA-Seq data.  
801 *PLoS One* 9: e103207.

802 **Figure legends**

803 **Figure 1: Principal component analysis of 32 wheat genotypes based on single-nucleotide**  
804 **polymorphisms (SNPs).** The first two principal components (PC1 and PC2) are shown. The  
805 three colors represent different taxa. Labels show the accession name of each genotype.

806 **Figure 2: Density plots of the additive coefficient of variation ( $CV_A$ ) in the three wheat**  
807 **taxa.** Comparison of the estimated density functions of the  $CV_A$  in gene expression, calculated  
808 using all 32,358 genes. **a** High nitrogen conditions. **b** Low nitrogen conditions. Dashed lines  
809 represent the averaged  $CV_A$  value, colored according to the different taxa.

810 **Figure 3:  $F_{ST}$  and  $Q_{ST}$  distributions.** **a** Boxplots showing the gene locus  $F_{ST}$  distribution for  
811 every subspecies pairwise comparison. **b** Boxplots showing the transcript  $Q_{ST}$  distribution for  
812 every subspecies pairwise comparison under low nitrogen and high nitrogen conditions,  
813 represented by empty and hatched grayscale bars, respectively.

814 **Figure 4: Differentially expressed genes (DEGs) when comparing high and low nitrogen**  
815 **conditions within each subspecies.** Venn diagrams showing **a** Total set of DEGs; **b**  
816 upregulated DEGs only; and **c** downregulated DEGs only.

817 **Figure 5: Principal component analysis of differentially expressed genes when comparing**  
818 **high and low nitrogen conditions within each subspecies.** **a,b** Plots based on all 6,991 DEGs  
819 (not filtered): **a** high nitrogen conditions and **b** low nitrogen conditions. **c,d** Plots based on 101  
820 DEGs that are also putatively under selection: **c** high nitrogen conditions and **d** low nitrogen  
821 conditions. Samples are represented by taxa-based colored dots. Labels show the accession  
822 name of each genotype.

823

824 **Supplementary Materials**

825 **Supplementary Figure S1:** Workflow of gene expression selection scanning.

826 **Supplementary Figure S2:** GO categories of genes under selection.

827 **Supplementary Figure S3:** Genome-wide distribution of differentially expressed genes  
828 (DEGs) in the comparison between contrasting nitrogen conditions within each subspecies.

829 **Supplementary Figure S4:** GO classification of differentially expressed genes (DEGs) in the  
830 comparison between contrasting nitrogen conditions within each subspecies.

831 **Supplementary Figure S5:** Differentially expressed genes (DEGs) between subspecies.

832

833 **Supplementary Table S1:** List of the 128 samples and read mapping results.

834 **Supplementary Table S2:** Raw read counts of the 32,358 genes.

835 **Supplementary Table S3:** Mean CV<sub>A</sub> in gene expression for the three wheat taxa and loss of  
836 expression diversity. The loss of expression diversity is shown for two gene subgroups (6,991  
837 DEGs and 25,367 non-DEGs).

838 **Supplementary Table S4:** List of the 967 genes retained from the “selection scan”. Each gene  
839 is accompanied by its functional annotation and the group in which the selection signal was  
840 detected.

841 **Supplementary Table S5:** List of GO “Biological process” and “Molecular function”  
842 subcategories for differentially expressed genes (DEGs). GO subcategories are shown for  
843 upregulated and downregulated genes under different nitrogen conditions for each subspecies,  
844 satisfying the criterion  $p \leq 10^{-5}$ .

845 **Supplementary Table S6:** Functional annotations of the differentially expressed genes  
846 (DEGs) between nitrogen conditions in each subspecies. Genes with the top 5%  $|\log_2FC|$  values  
847 are shown.

848 **Supplementary Table S7:** Functional annotations of the differentially expressed genes  
849 (DEGs) between subspecies under all nitrogen conditions. The corresponding  $\log_2FC$  values  
850 are shown.

851 **Supplementary Table S8:** Functional annotation of the 101 genes selected by the integration  
852 of selection signatures and differential expression analysis between nitrogen conditions.



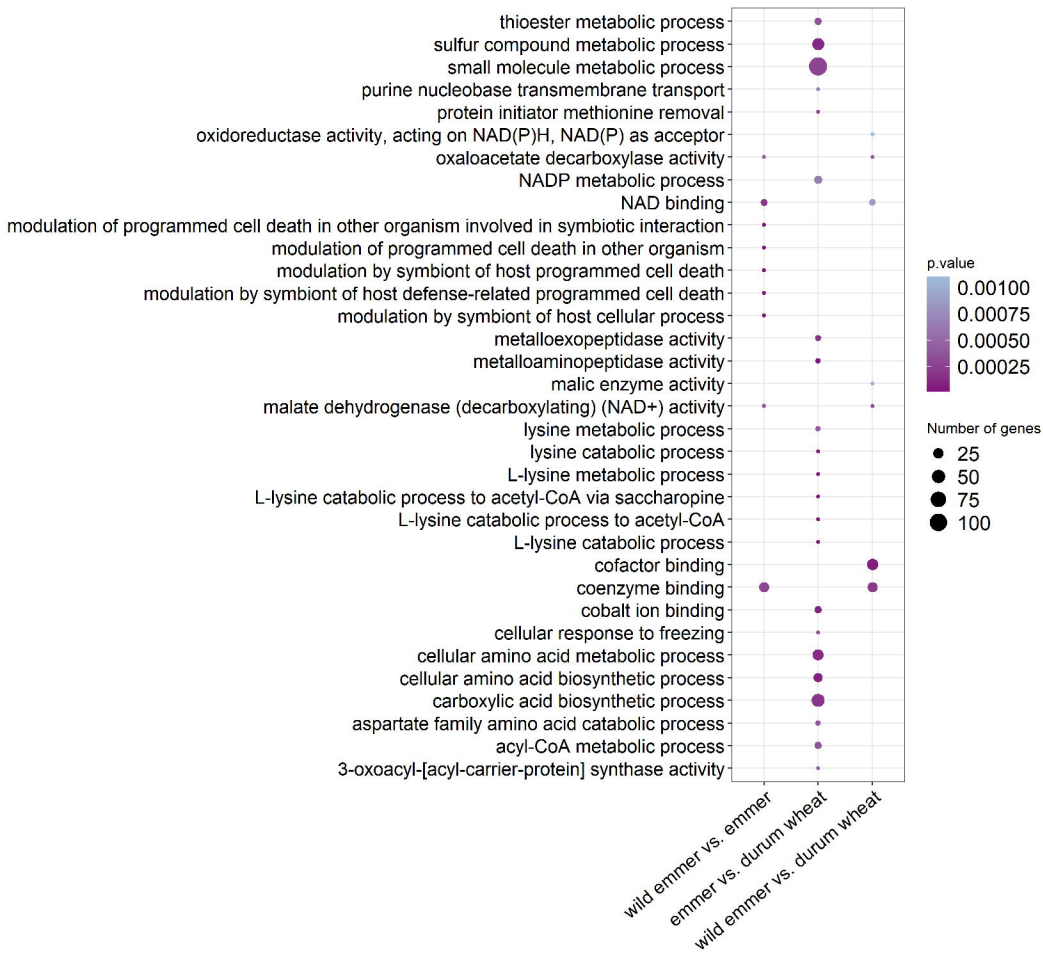

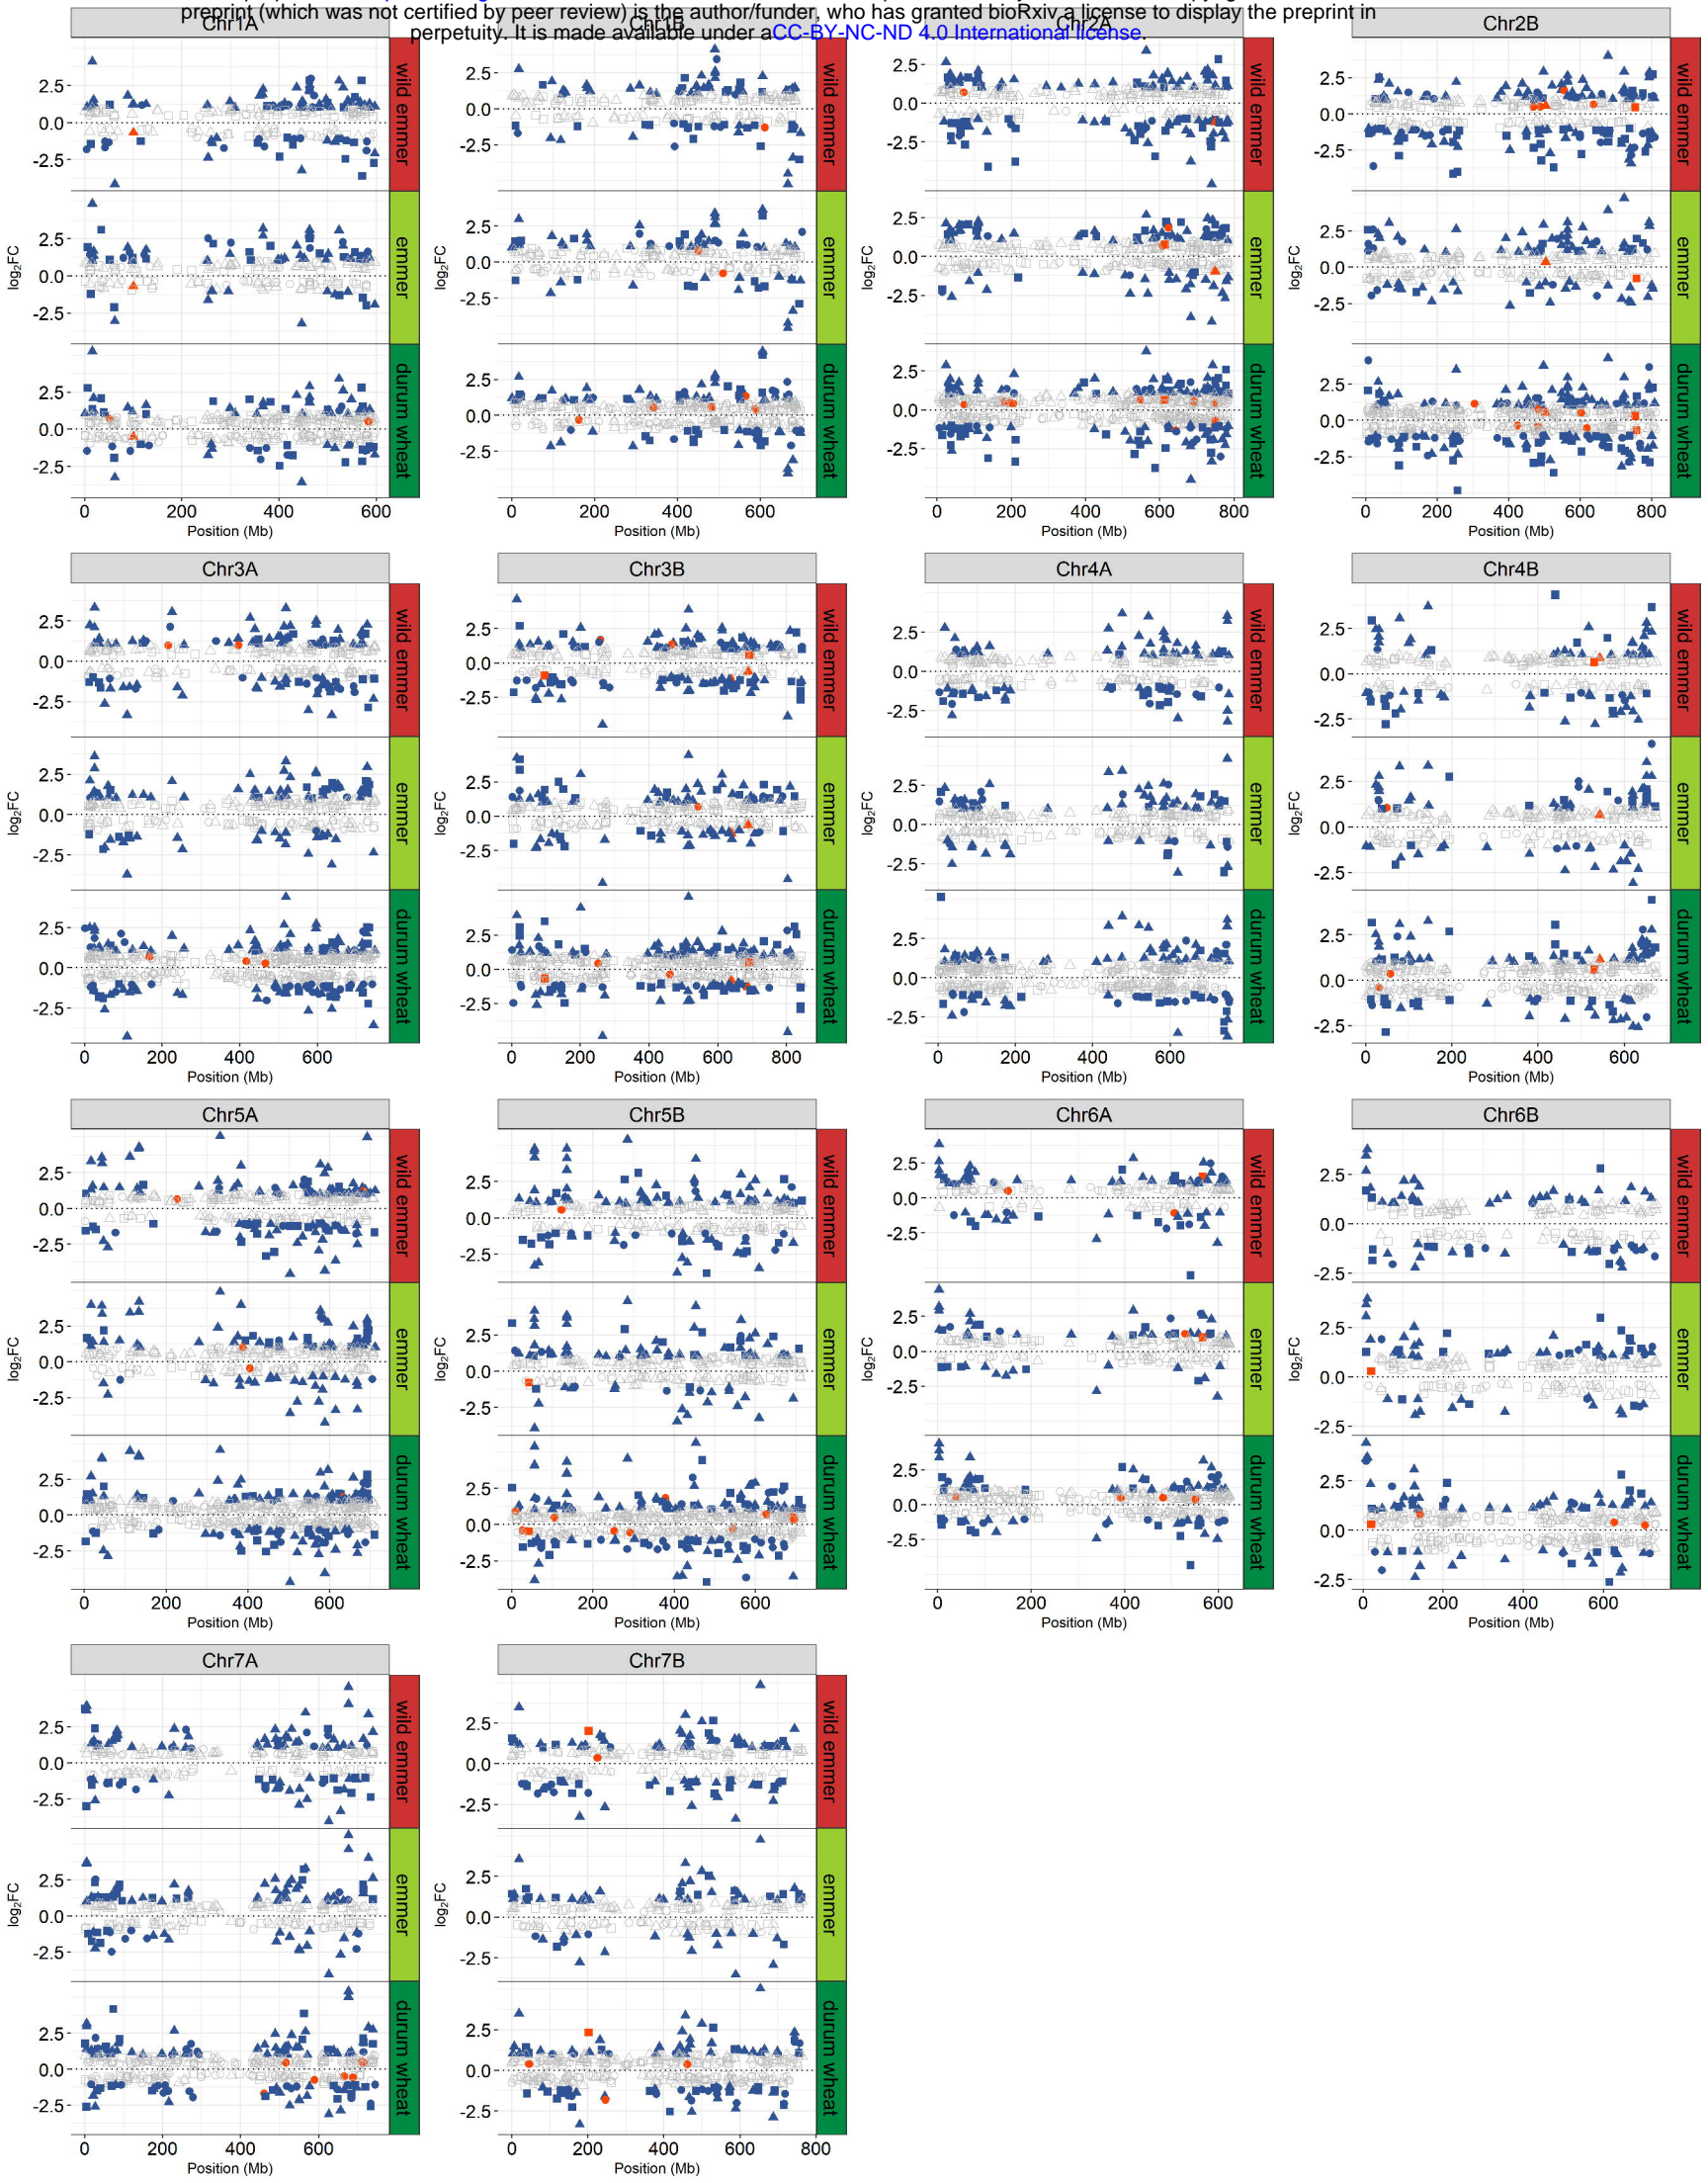

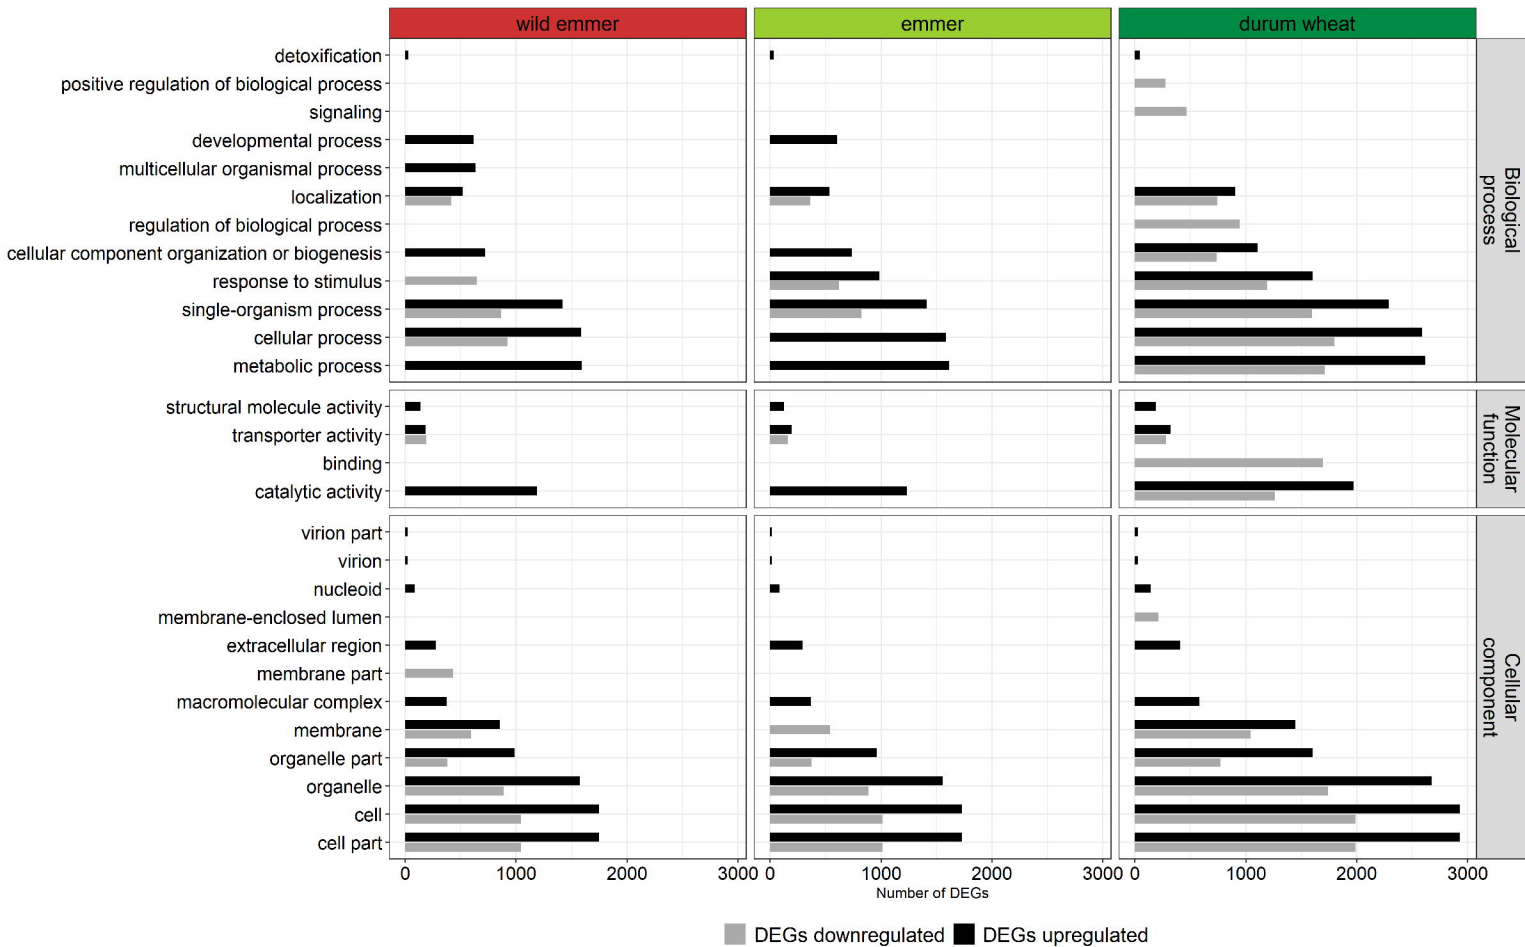

**a** DEGs between species  
in high N conditions

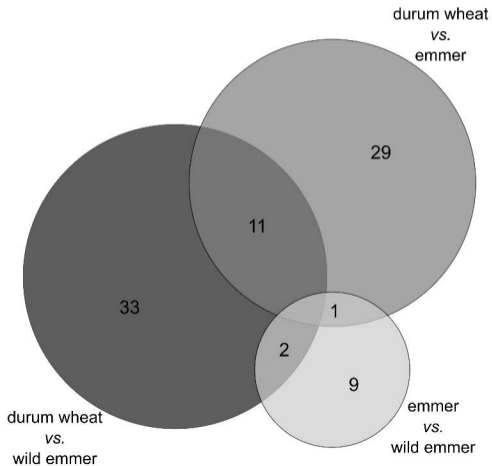

**b** DEGs between species  
in low N conditions

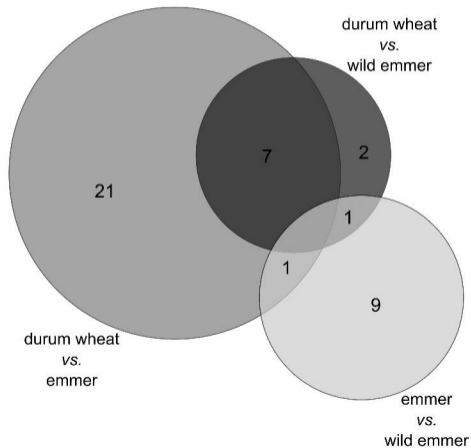

|          | wild emmer | emmer  | durum wheat | Loss of nucleotide diversity |      |      |
|----------|------------|--------|-------------|------------------------------|------|------|
|          |            |        |             | Lpd                          | Lsd  | both |
| $\pi$    | 0.0080     | 0.0040 | 0.0020      | 11.4                         | 34.6 | 42.1 |
| $\theta$ | 0.0047     | 0.0040 | 0.0020      | 18.3                         | 27.2 | 38.2 |
| D        | 0.2513     | 0.4505 | 1.0547      |                              |      |      |

|              |             |        |             | Loss of expression diversity |      |      |
|--------------|-------------|--------|-------------|------------------------------|------|------|
|              | wild animal | animal | durum wheat | Lpd                          | Lsd  | both |
| CV<br>High N | 0.082       | 0.086  | 0.088       | 9.1                          | 14.8 | 22.7 |
| CV<br>Low N  | 0.076       | 0.083  | 0.085       | 17.8                         | 11.1 | 26.7 |

PC2: 19.01% variance

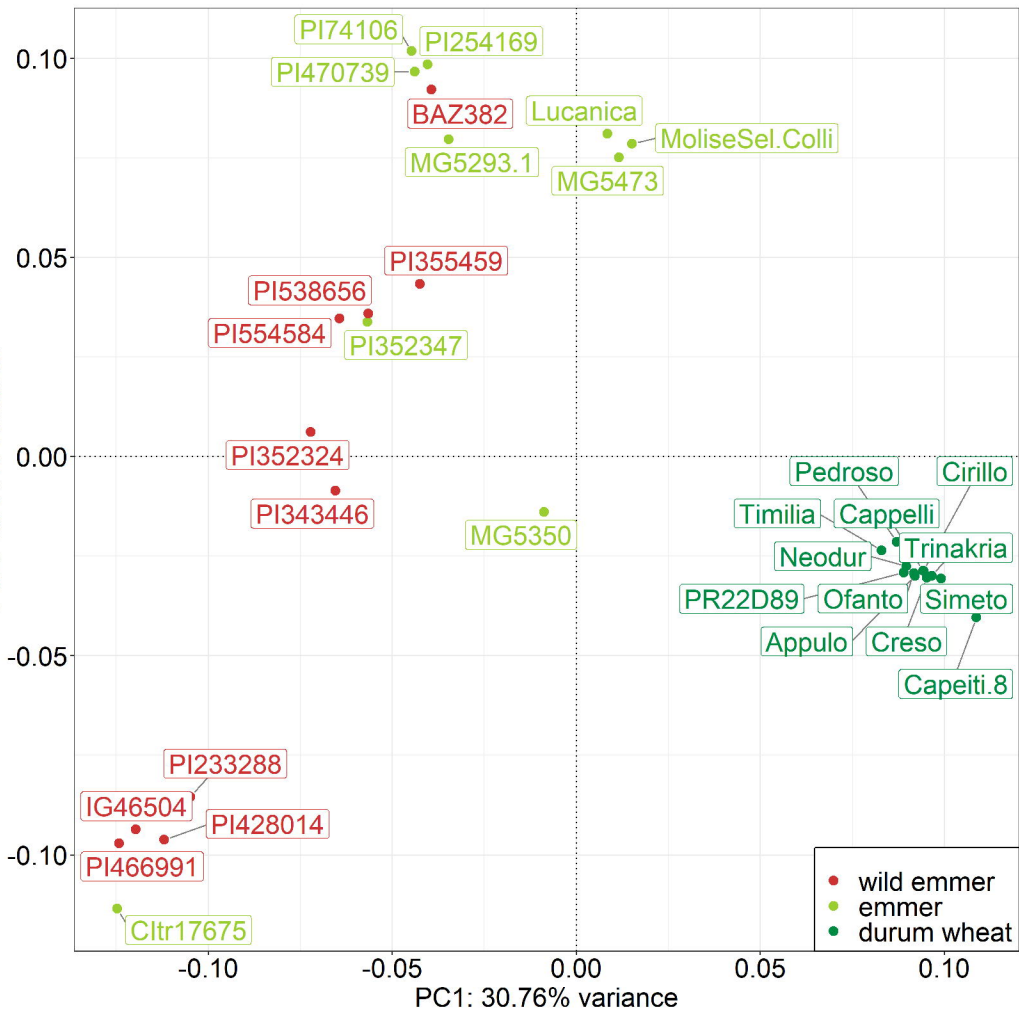

PC1: 30.76% variance

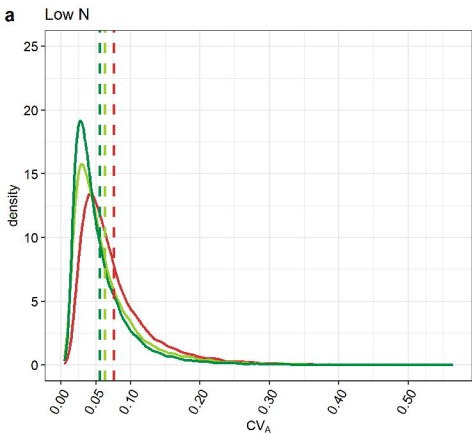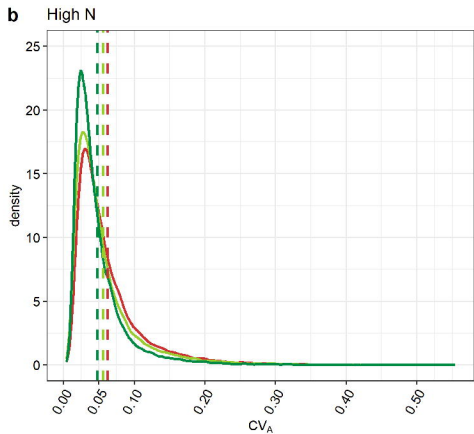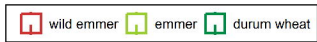



**a**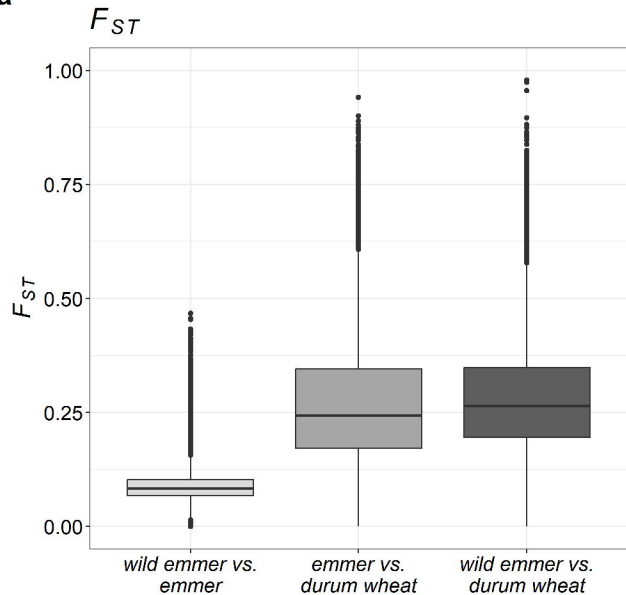**b**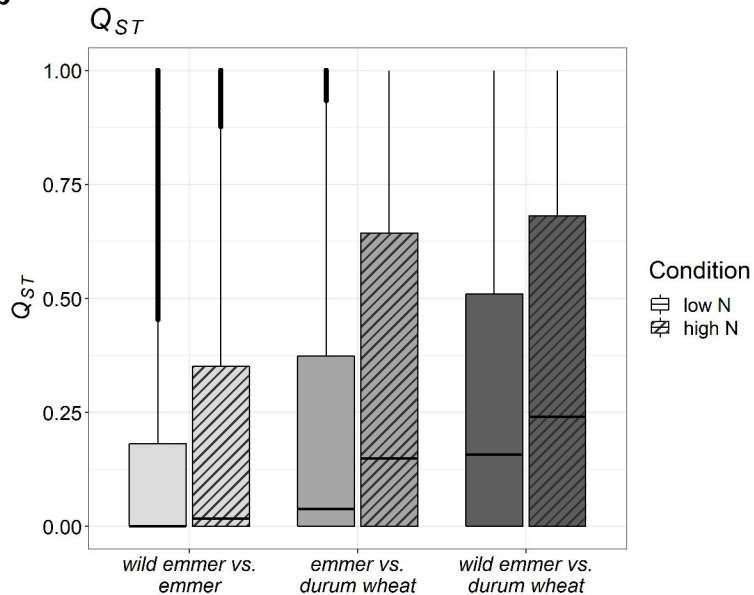

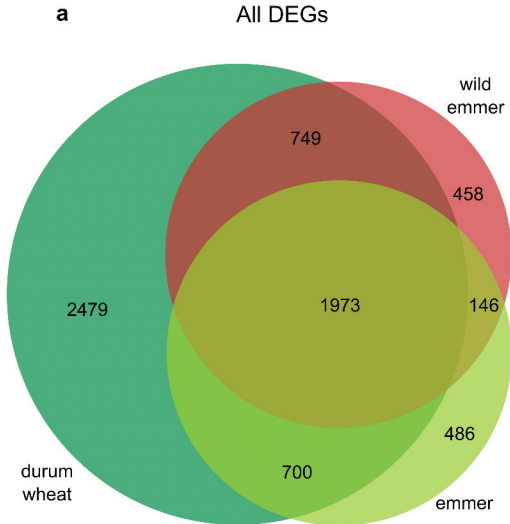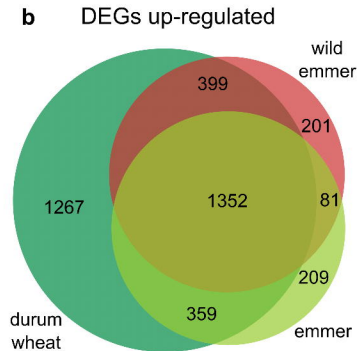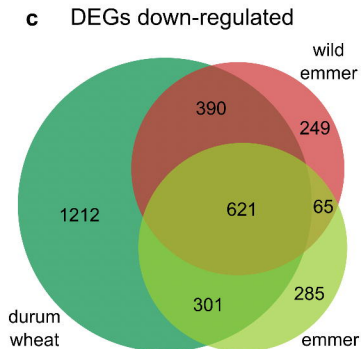

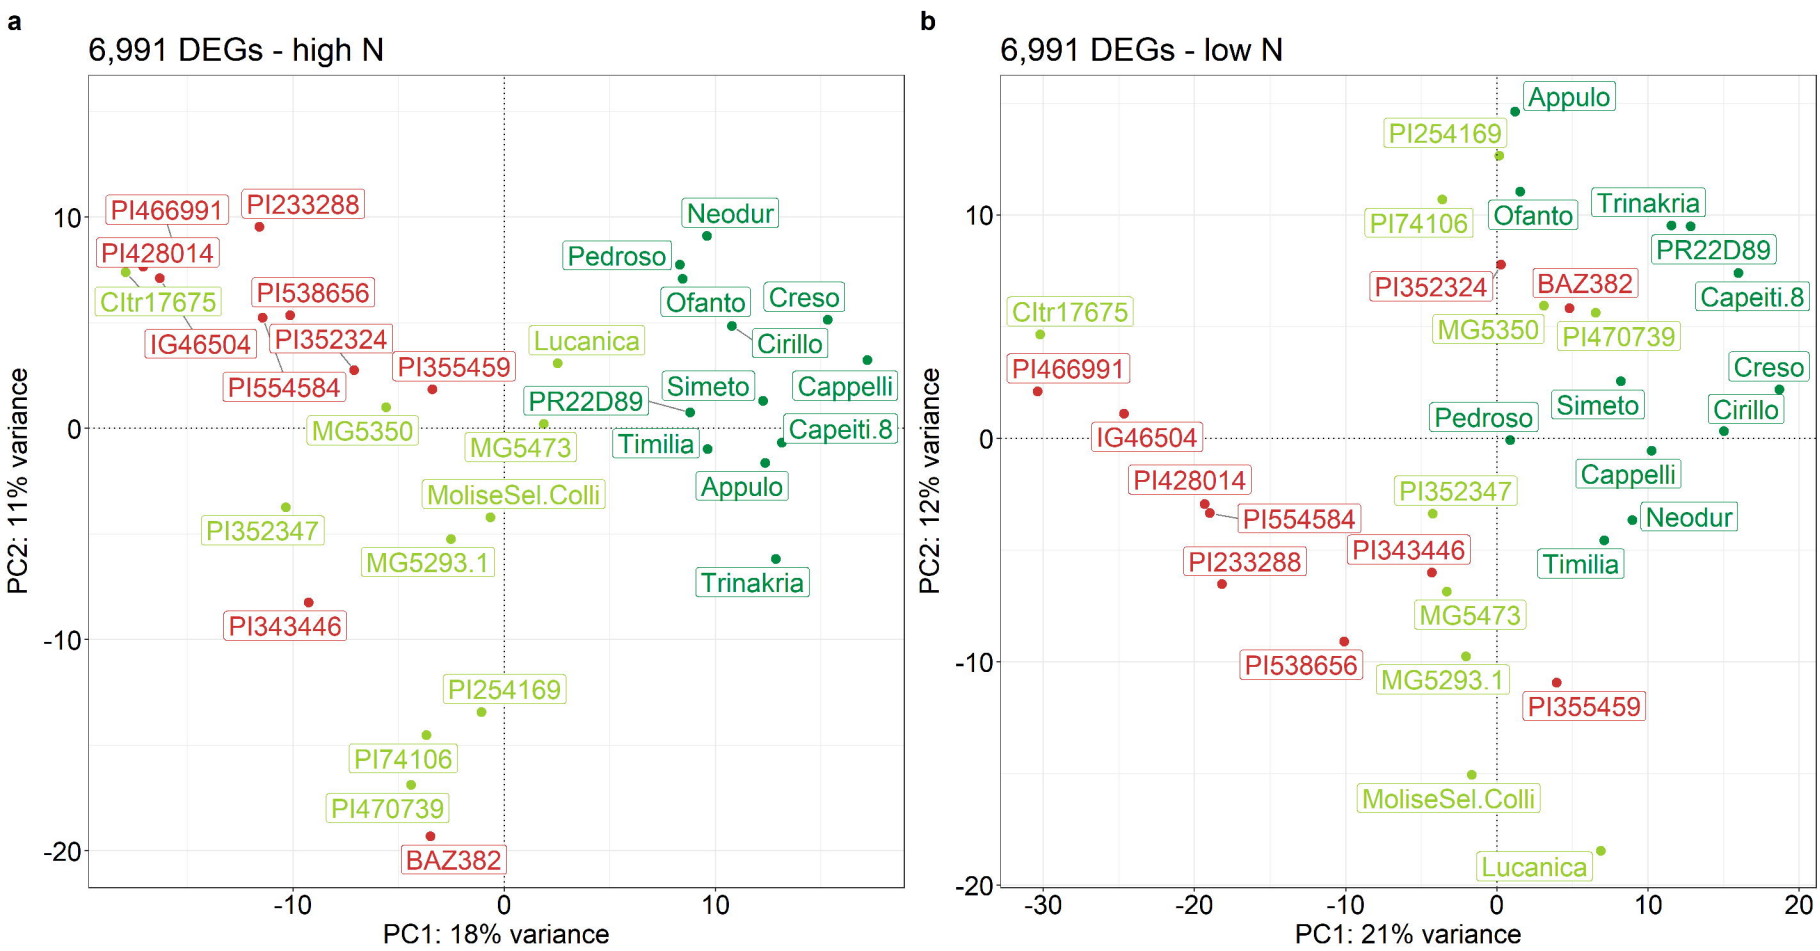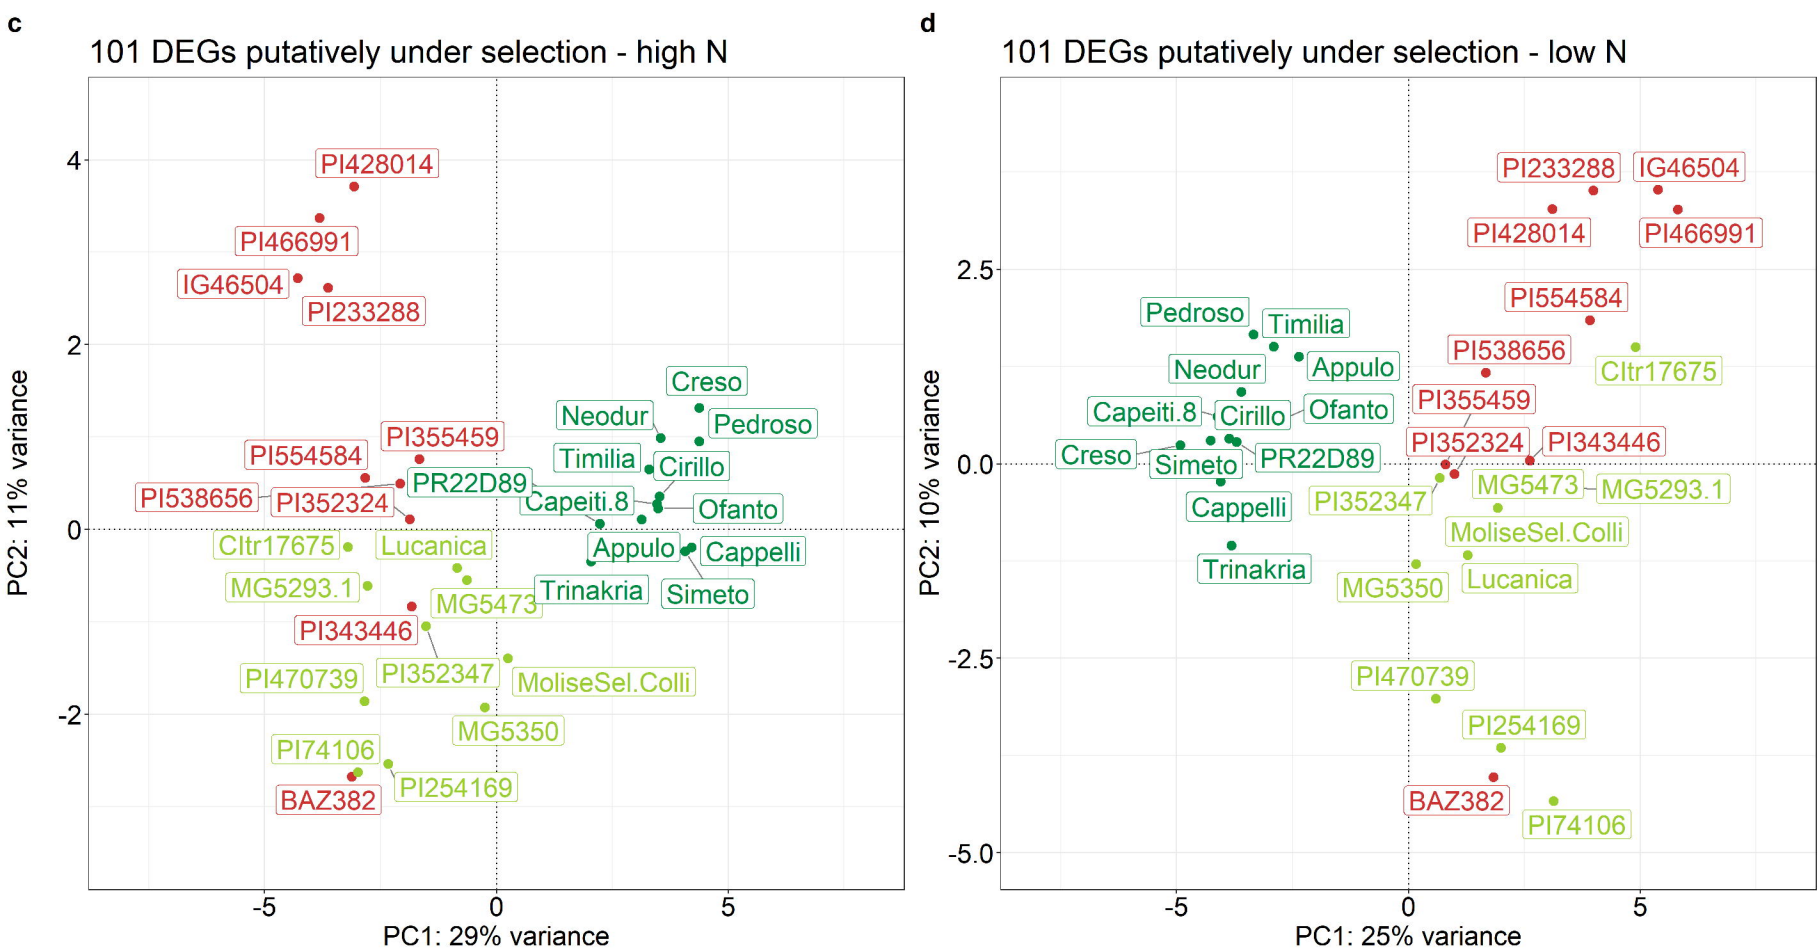

• wild emmer • emmer • durum wheat

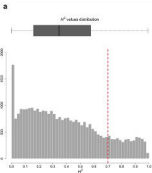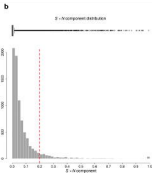

**c**

1

$H^2 \geq 0.7$   
5,227 genes

$S \times W$  component  $\geq 0.2$   
641 genes

2

Top 5% of every  $Q_{ST}$  distribution  
6 groups with ~285 genes each. TOT. 973 GENES

3

$F_{ST} > 0.01$  and  $Q_{ST} > F_{ST}$   
967 genes
